# Supplementary material for: Administration of RANKL boosts thymic regeneration upon bone marrow transplantation
Source: PubMed Central journal article supplement (PMC5452038; doi:10.15252/emmm.201607176), 2017-04-28
Supplement: EMMM-9-835-s001.pdf [file EMMM-9-835-s001.pdf]

# Appendix

## Administration of RANKL boosts thymic regeneration upon bone marrow transplantation

Noella Lopes, Hortense Vachon, Julien Marie and Magali Irla

1. Appendix figures and figure legends S1 to S9.....Page 2-10
2. Appendix table S1 .....Page 11
3. Appendix table S2 ..... Page 12-22

## Appendix Figure S1

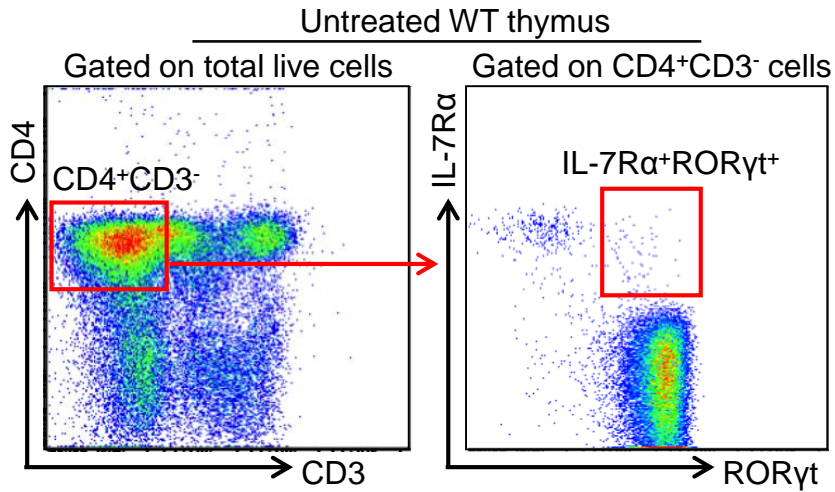

**Appendix Figure S1. Gating strategy used to identify LTi cells in the thymus.**

Thymic cells from untreated WT mice were analyzed by flow cytometry for the expression of CD4 and CD3. CD4<sup>+</sup>CD3<sup>-</sup> cells were analyzed for the expression of IL-7Rα and RORγt. LTi cells were identified as CD4<sup>+</sup>CD3<sup>-</sup>IL-7Rα<sup>+</sup>RORγt<sup>+</sup>.

## Appendix Figure S2

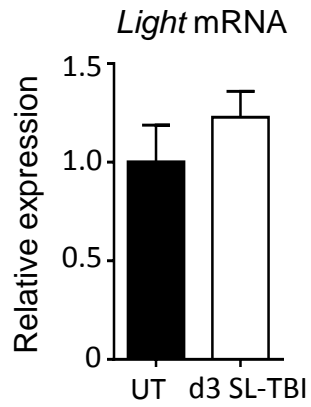

### Appendix Figure S2: LIGHT mRNA is not upregulated after SL-TBI.

The expression of *Light* mRNA was measured by qPCR in the total thymus isolated from UT WT mice (n=4) or at d3 SL-TBI (n=4). Data information: Data are shown as mean  $\pm$  SEM.

## Appendix Figure S3

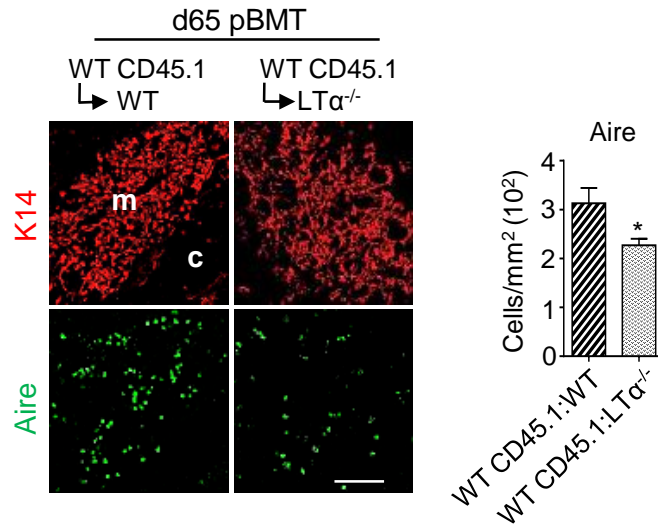

### Appendix Figure S3 : Aire<sup>+</sup> mTEC regeneration is altered at d65 pBMT in $LT\alpha^{-/-}$ recipient mice.

Thymic sections from WT CD45.1:WT and WT CD45.1: $LT\alpha^{-/-}$  chimeras at d65 after BMT were stained for the expression of K14 and Aire. m and c denote the medulla and the cortex, respectively. The histogram shows the density of Aire<sup>+</sup> mTECs in medullary areas. Fifteen sections were quantified. Scale bar, 100 $\mu$ m.

Data information: Data are shown as mean  $\pm$ SEM. Exact P-values are provided in Appendix Table S2.

# Appendix Figure S4

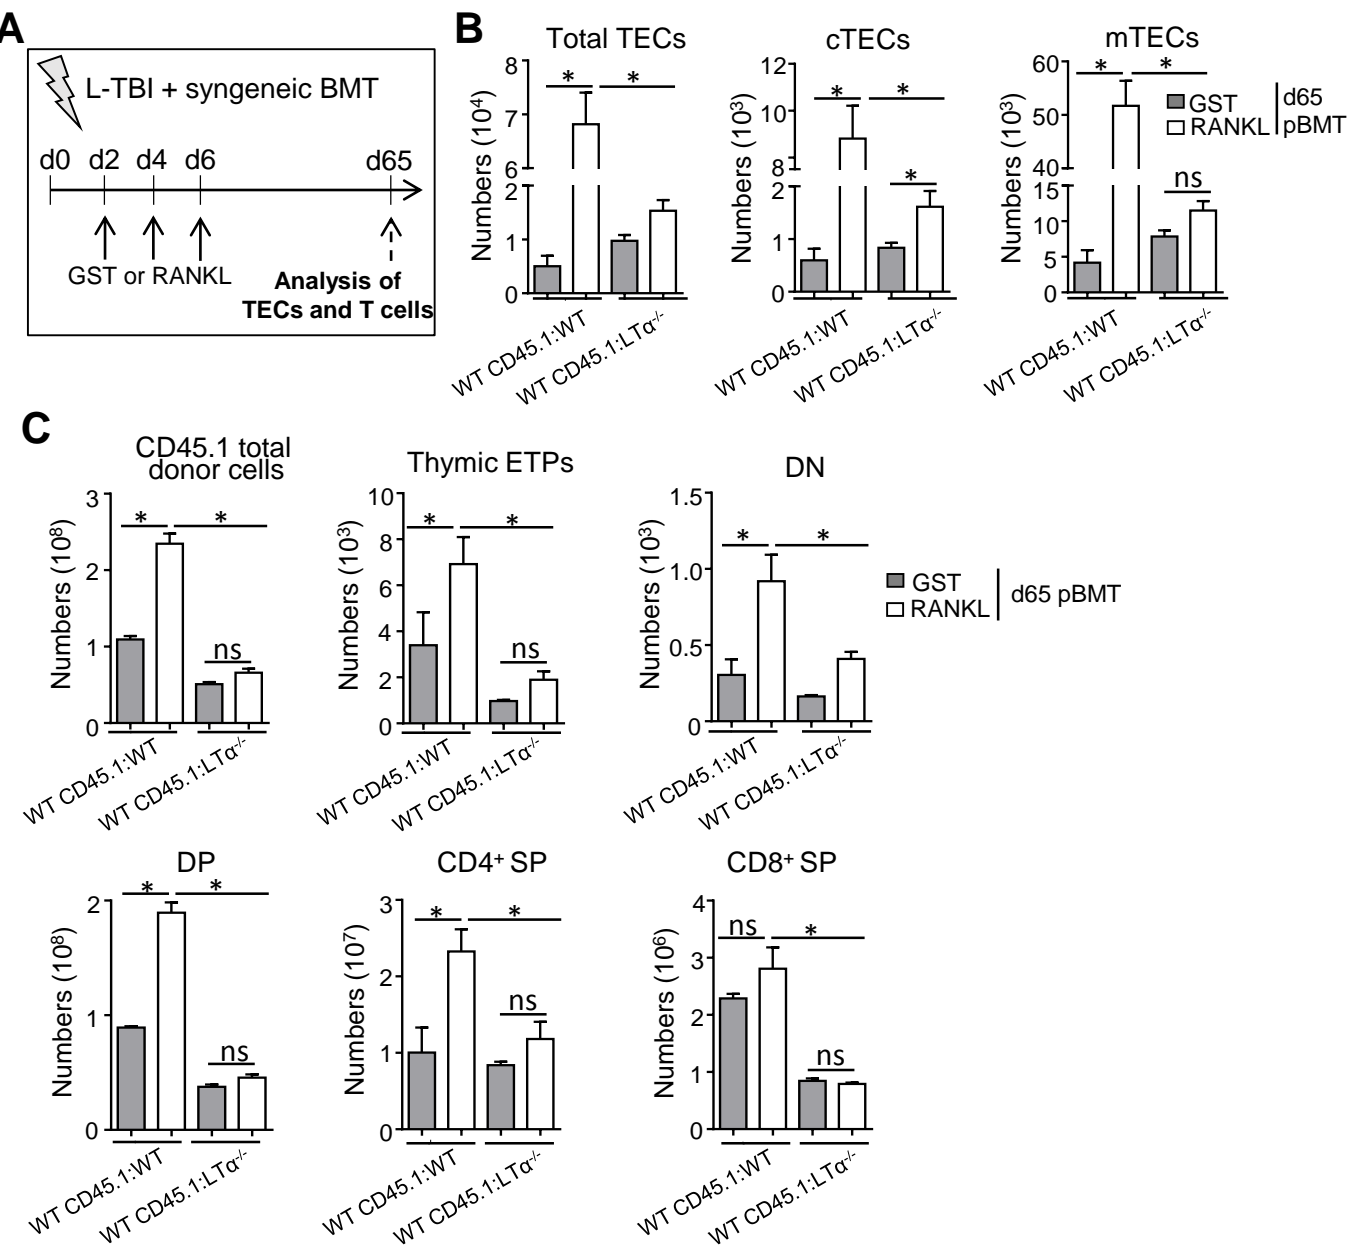

**Appendix Figure S4: RANKL administration boosts TEC regeneration and *de novo* thymopoiesis in an LTα-dependent manner during BMT.**

**A** Experimental setup: WT CD45.1:WT and WT CD45.1:LTα<sup>-/-</sup> chimeras were treated with GST or RANKL-GST proteins at d2, d4 and d6 after BMT and TEC regeneration and T-cell reconstitution were analyzed at d65 after BMT.

**B-C** Histograms show numbers of total TECs, cTECs and mTECs (B) and total donor cells and T-cell subsets (ETPs, DN, DP, CD4<sup>+</sup> SP and CD8<sup>+</sup> SP cells) of CD45.1 origin (C) in the thymus.

Data information: Data are shown as mean ± SEM and are pooled of 2 independent experiments with similar results (n=3 mice per group). Exact P-values are provided in Appendix Table S2.

# Appendix Figure S5

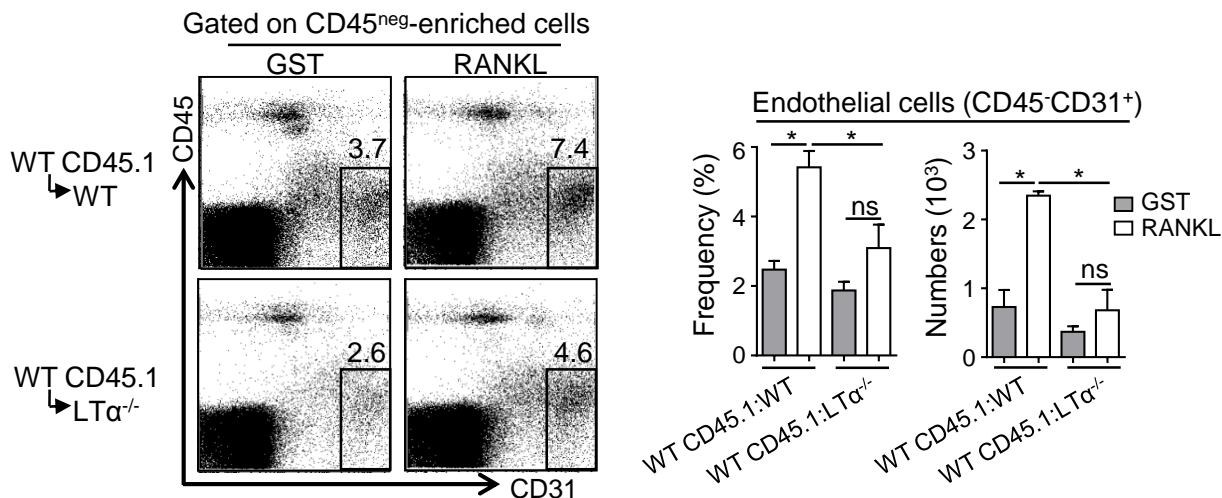

**Appendix Figure S5: RANKL treatment increases numbers of thymic endothelial cells in an LTα-dependent manner during BMT.**

Flow cytometry profiles, frequencies and numbers of CD45<sup>-</sup>CD31<sup>+</sup> endothelial cells from the thymus of WT CD45.1:WT and WT CD45.1:LTα<sup>-/-</sup> chimeras treated with GST or RANKL-GST proteins at d2, d4 and d6 after BMT and analyzed at d21 after BMT.

Data are shown as mean ± SEM and are pooled of 2 independent experiments with similar results (n=3 mice per group). Exact P-values are provided in Appendix Table S2.

# Appendix Figure S6

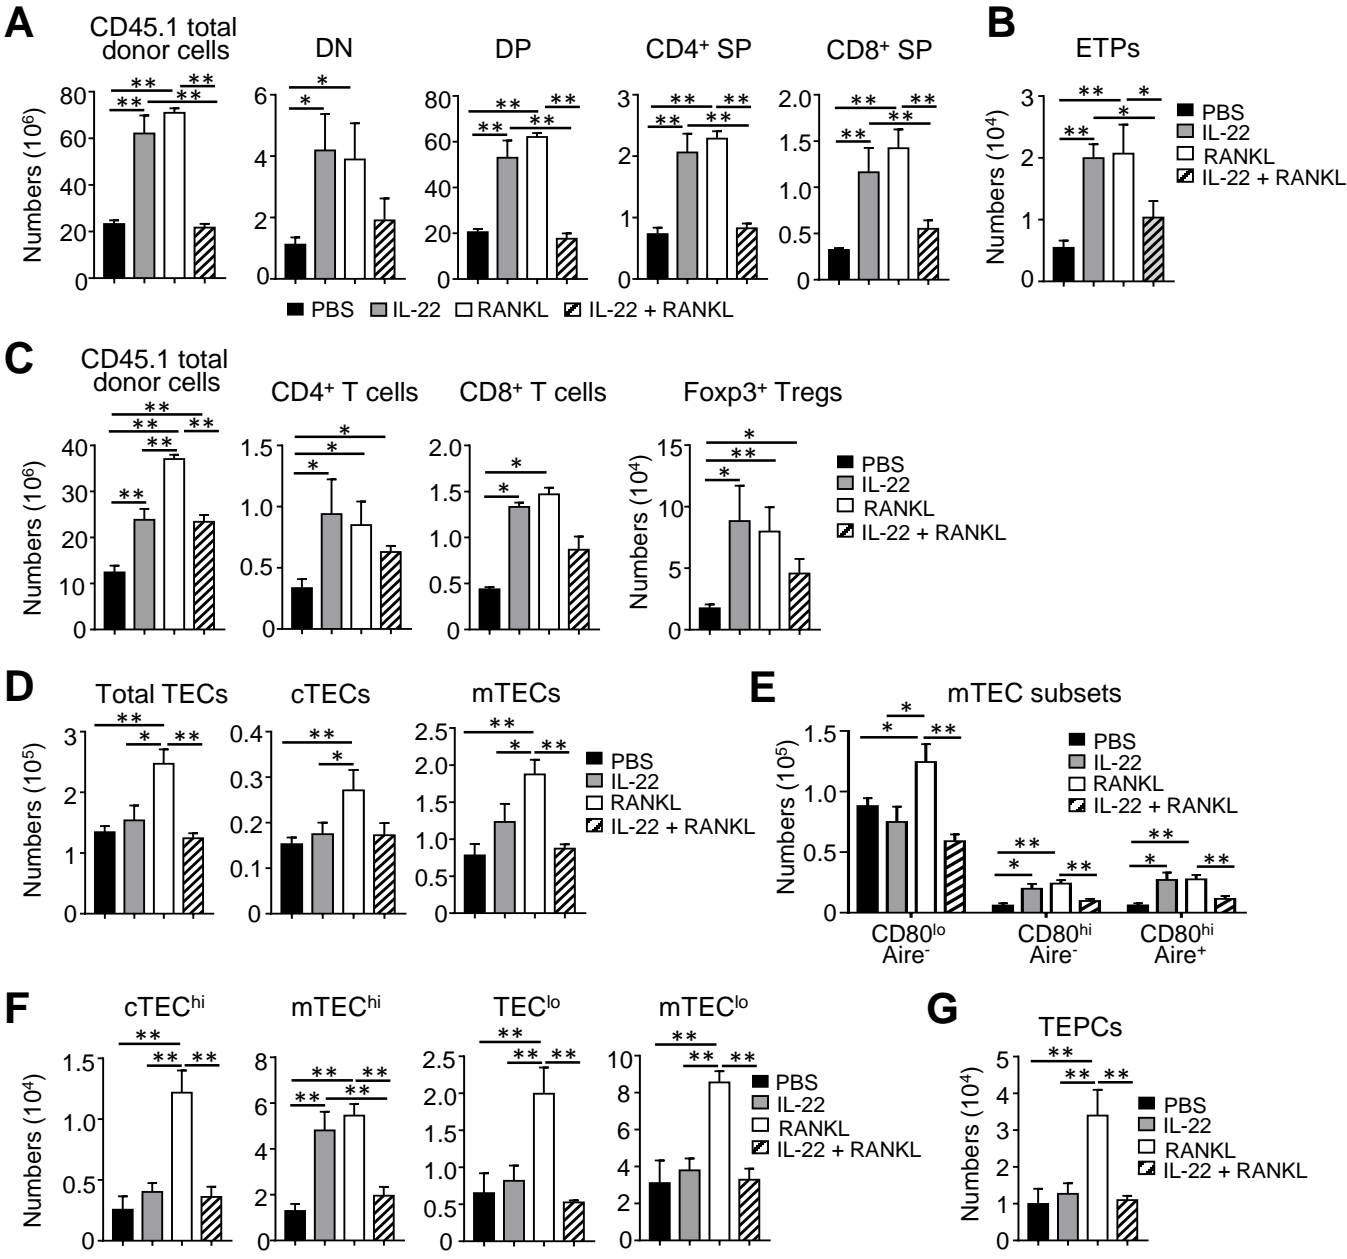

**Appendix Figure S6. The administration of RANKL and IL-22 alone boosts similarly thymopoiesis upon BMT but RANKL shows a superior capacity on TEC regeneration.**

A-B Numbers of total cells and T-cell subsets (A) and ETPs (B) of CD45.1 donor origin analyzed in the thymus.  
 C Numbers of total donor cells, CD4<sup>+</sup> and CD8<sup>+</sup> T cells as well as CD4<sup>+</sup>Foxp3<sup>+</sup> Tregs from CD45.1 donor origin in the spleen.  
 D,E Numbers of total TECs, cTECs, mTECs (D) and mTEC subsets (CD80<sup>lo</sup>Aire<sup>-</sup>, CD80<sup>hi</sup>Aire<sup>-</sup> and CD80<sup>hi</sup>Aire<sup>+</sup>) (E) analyzed at d21 pBMT in CD45<sup>neg</sup>-enriched cells by AutoMACS from WT CD45.1:WT chimeras treated with PBS, IL-22, RANKL or IL-22+RANKL at d2, d4 and d6 after BMT.  
 F,G Histograms show numbers of cTEC<sup>hi</sup>, mTEC<sup>hi</sup>, TEC<sup>lo</sup>, mTEC<sup>lo</sup> (F) and TEPC-enriched (G).

Data are shown as mean ±SEM and are pooled of 2 independent experiments with similar results (n=3 mice per group). Exact P-values are provided in Appendix Table S2.

# Appendix Figure S7

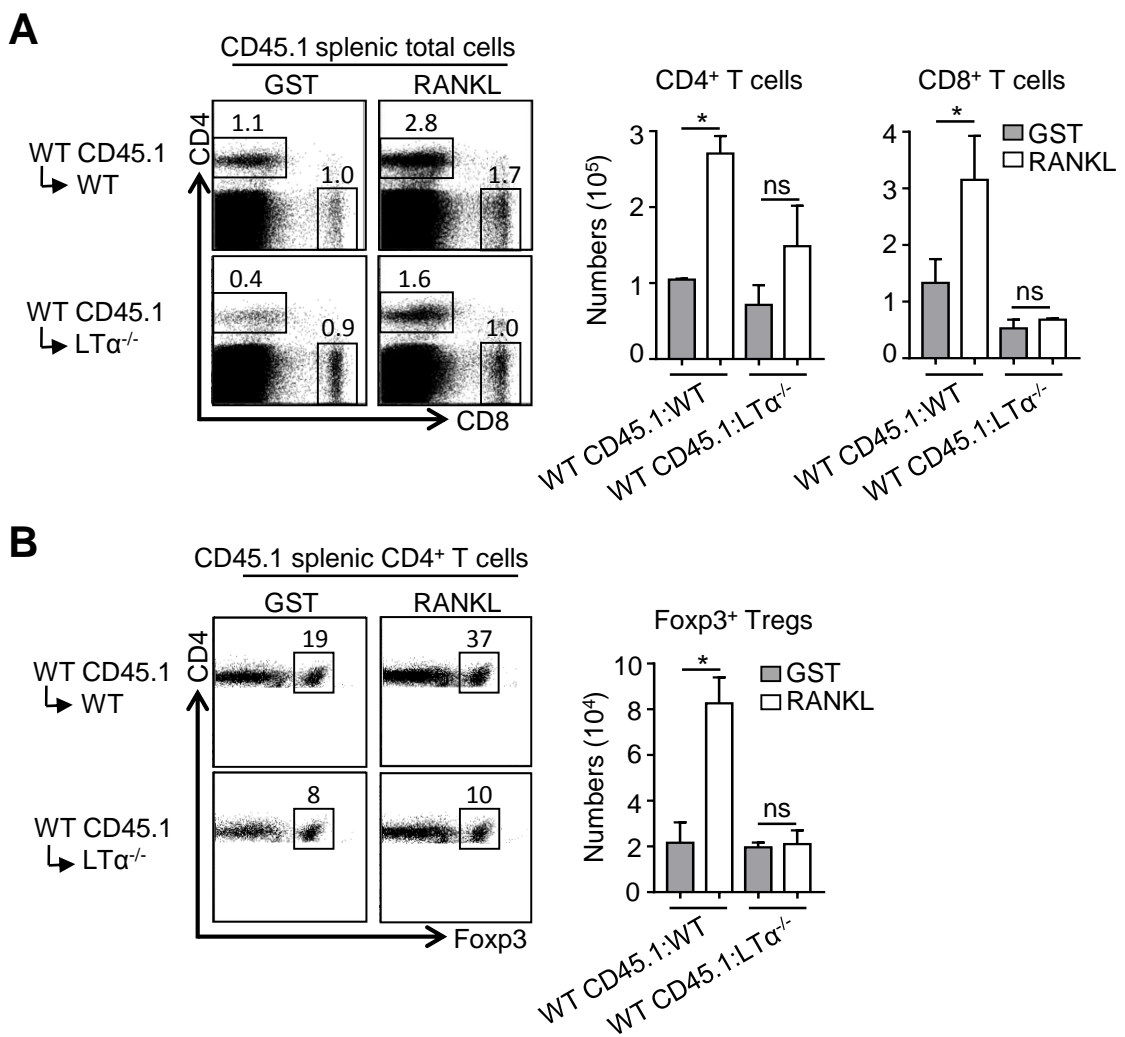

**Appendix Figure S7. Administration of RANKL protein boosts peripheral T-cell reconstitution in an LT $\alpha$ -dependent manner upon BMT in aged mice that show early thymic involution.**

Flow cytometry profiles and numbers of CD4<sup>+</sup> and CD8<sup>+</sup> T cells (A) as well as CD4<sup>+</sup>Foxp3<sup>+</sup> Tregs (B) in the spleen from WT CD45.1:WT and WT CD45.1:LT $\alpha^{-/-}$  mice of 6-8 months of age treated with GST or RANKL at d2, d4 and d6 pBMT and analyzed at d21 pBMT. Significance relative to WT CD45.1:WT chimeras.

Data are shown as mean  $\pm$ SEM and are pooled of 2 independent experiments with similar results (n=3 mice per group). Exact P-values are provided in Appendix Table S2.



# Appendix Figure S8

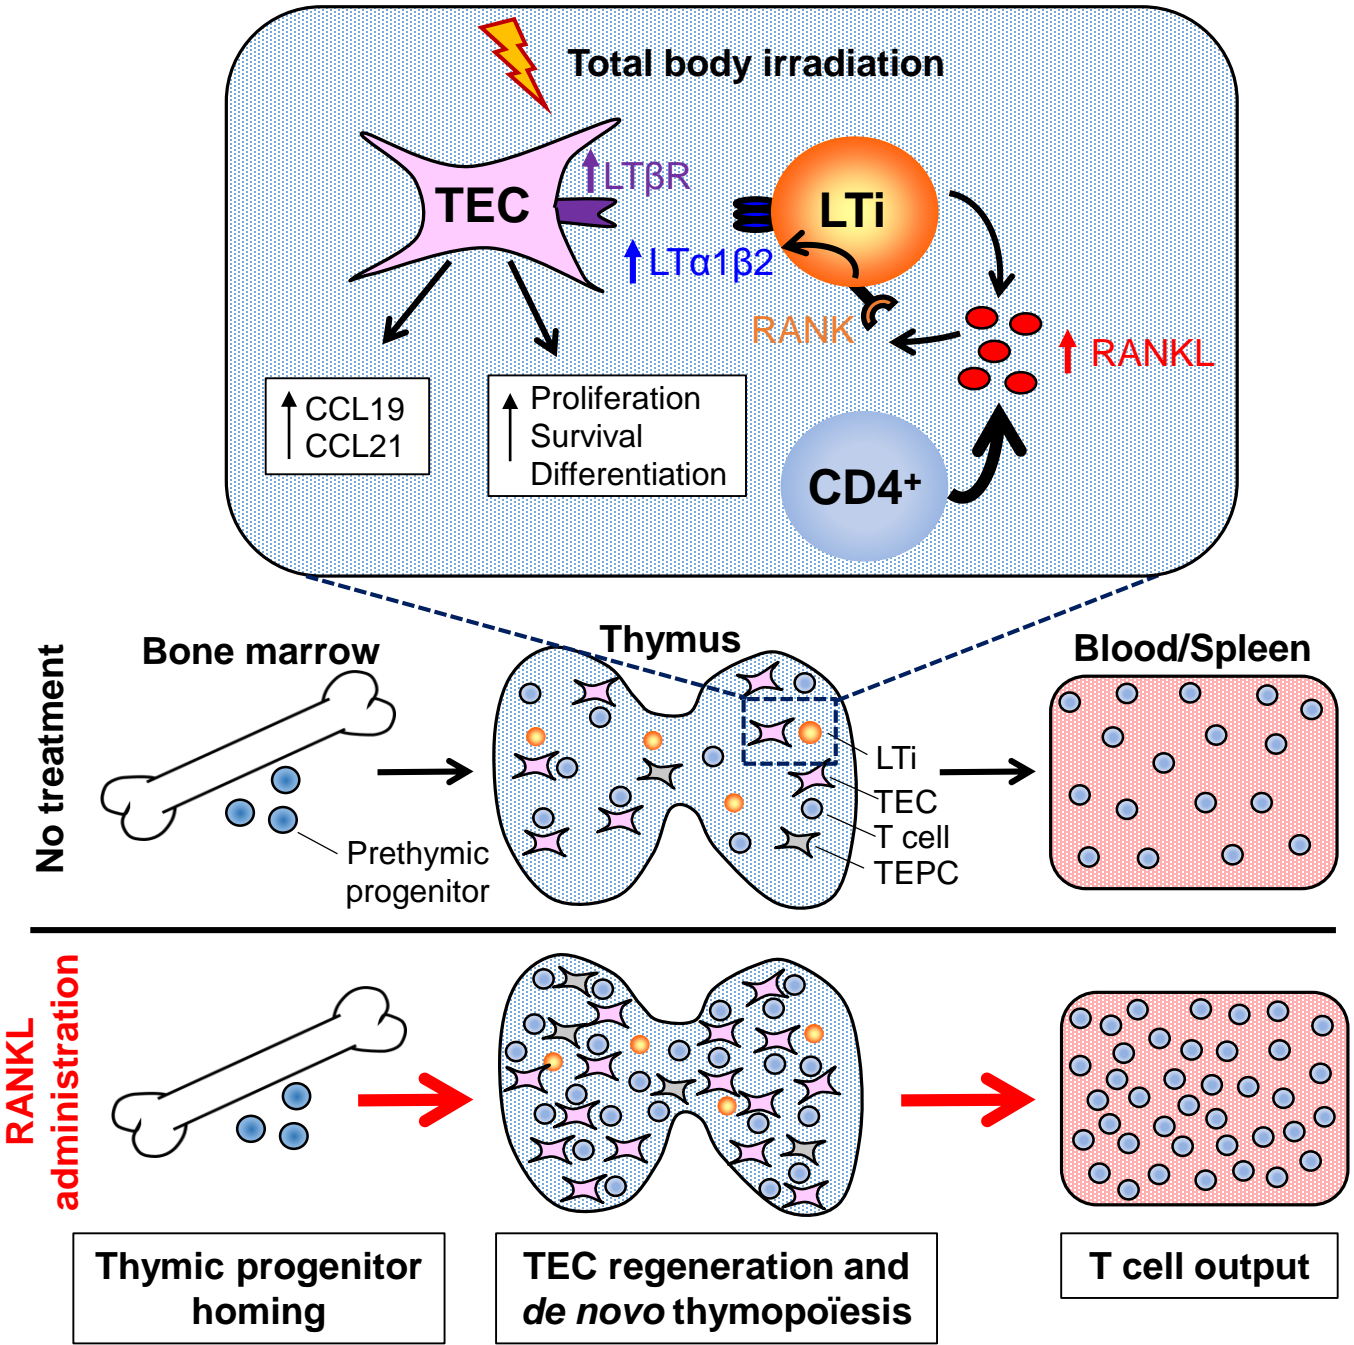

**Appendix Figure S8. RANKL administration boosts thymic regeneration upon BMT in an LTα-dependent manner.**

After total body irradiation (TBI), CD4<sup>+</sup> SP and LTi cells upregulate RANKL, which in turn increases LTα1β2 expression specifically in LTi cells. TBI also induces the upregulation of LTβR expression in all TEC subsets including TEPC-enriched cells. The expression of LTα is crucial for TEC and T-cell recovery. Importantly, the *ex vivo* administration of RANKL protein boosts TEC proliferation, survival and differentiation as well as the expansion of TEPC-enriched cells and therefore enhances TEC regeneration. Furthermore, RANKL treatment induces chemokines in TECs and adhesion molecules in endothelial cells involved in thymus homing, which ameliorates the thymic entry of T-cell progenitors, *de novo* thymopoiesis and peripheral T-cell recovery after BMT.

# Appendix Figure S9

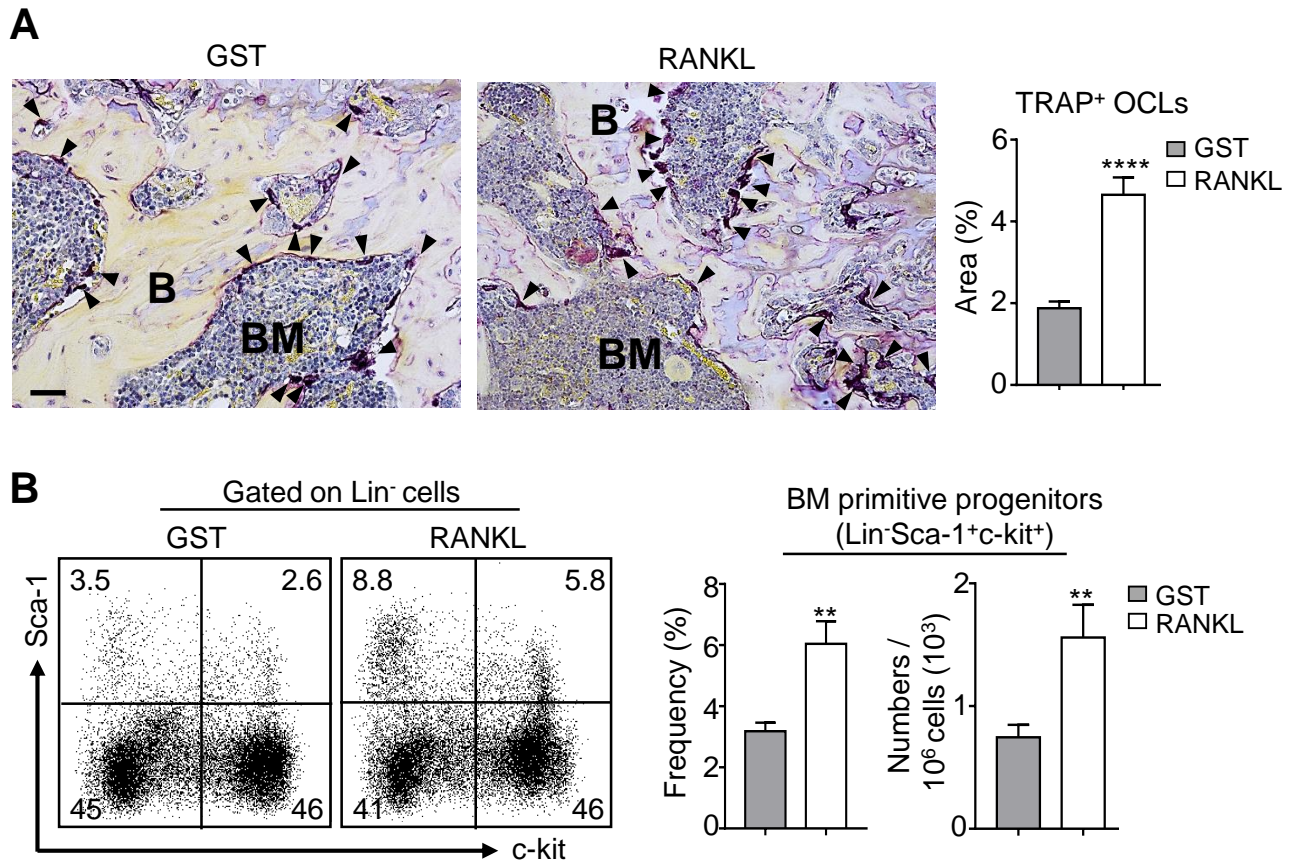

**Appendix Figure S9. RANKL administration upon BMT induces the development of TRAP<sup>+</sup> osteoclasts and increases primitive progenitors in the BM.**

**A** TRAP staining of femur epiphysis and metaphysis analyzed at d21 pBMT from WT CD45.1: WT chimeras injected with GST or RANKL at d2, d4 and d6 after BMT. Thirty five sections were quantified for each condition. Arrowheads indicate active TRAP<sup>+</sup> OCL stained in purple. Scale bar, 1mm. B: bone; BM: bone marrow.

**B** Flow cytometry profiles, percentage and numbers of BM primitive progenitors (Lin<sup>-</sup>Sca-1<sup>+</sup>c-kit<sup>+</sup>) analyzed at d21 pBMT from WT CD45.1: WT chimeras injected with GST or RANKL.

Data are shown as mean ±SEM and are pooled of 2 independent experiments with similar results (n=3 mice per group). Exact P-values are provided in Appendix Table S2.

# Appendix Table S1: Primers used for qRT-PCR

| Gene name      | Forward (5'-3')            | Reverse (5'-3')             |
|----------------|----------------------------|-----------------------------|
| Actin          | CAGAAGGAGATTACTGCTCTGGCT   | GGAGCCACCGATCCACACA         |
| LT $\alpha$    | GCTTGGCACCCCTCCTGTC        | GATGCCATGGGTCAAGTGCT        |
| LIGHT          | GGGCTGGTTTCTCCTGAGAC       | GCTTCTCCCAGGAGCCTTTG        |
| IL-22          | ACAGGTTCCAGCCCTACATG       | GTCGTCACCGCTGATGTG          |
| IL-23          | CCCGTATCCAGTGTGAAGATG      | CCCTTTGAAGATGTCAGAGTCA      |
| RANK           | TGCTTGCTGCATAAAGTCTG       | AGGTTTGCATTTGTCTGTGG        |
| RANKL          | CGCTCTGTTCTGTACTTTC        | AGAGTCGAGTCCTGCAAATC        |
| CCL25          | GCCTGGTTGCCTGTTTTGTT       | ACCCAGGCAGCAGTCTTCAA        |
| CCL19          | GCTAATGATGCGGAAGACTG       | ACTCACATCGACTCTCTAGG        |
| CCL21          | GCTGCCTTAGTACAGCCAG        | GTGTCTGTTCAAGTCTCTTGC       |
| ICAM-1         | CCTGGTCACCGTTGTGATCC       | TCAGCCACRGAGTCTCCAAG        |
| VCAM-1         | TGCCGAGCTAAATTACACATTG     | CCTTGTGGAGGGATGTACAGA       |
| Selp           | CCTAGGAACATACGGAGTCTTCACTA | CCTGAGAAATCGAATGAGACATTG    |
| EpCAM          | AAAGCCCCTACGACCATCAGA      | TCTGATTCAGCTTATATCGAGATGTGA |
| CD31           | ACGCTGGTGCTCTATGCAAG       | TCAGTTGCTGCCCATTCATCA       |
| Aire           | GCATAGCATCCTGGACGGCTTCC    | CTGGGCTGGAGACGCTCTTTGAG     |
| SP1            | TGGTGAAAATACTGGCTCTGAA     | GCAGTGTTGGTATCATCAGTG       |
| SP2            | TCAGACCAAAGTGGGTGACA       | CTCTTGTCTCATTGGAGGT         |
| Casein $\beta$ | CTCCACTAAAGGACTTGACAG      | ACCTTCTGAAGTTTCTGCTC        |
| Bax            | CTCAAGGCCCTGTGCACTAA       | CACGGAGGAAGTCCAGTGTC        |
| Bcl-xl         | CGCCGGAGATAGATTTGAATAACC   | CCCGGTTGCTCTGAGACATT        |
| Bid            | GACTCTGAGGTCAGCAACGG       | CCTCCCAGTAAGCTTGACACA       |
| Bak            | CCAAGATCGCCTCCAGCCTA       | CACGCTGGTAGACGTACAGG        |
| Fezf2          | CAGCACTCTCTGCAGACACAA      | TGCCGCACTGGTTACTTA          |
| Apoc3          | CCTCTTGGCTCTCCTGGCATCT     | TGCTCCAGTAGCCTTTCAGGG       |
| Fabp9          | CACTGCAGACAACCGAAAAG       | TCTGTTTGCCAAGCCATTTT        |
| Resp18         | TCAGTCAGCAACAAGGTTGAGGCCAC | CCAGCCAAGATGCAGAGTTCGTAAAG  |

**Appendix Table S2: Exact p-values derived from statistical tests.**

| Figure    | Comparison                                                     | p-values | Category | Test                                    |
|-----------|----------------------------------------------------------------|----------|----------|-----------------------------------------|
| Figure 1A | CD45+ cells; UT vs d3 SL-TBI                                   | <0.0001  | ****     | T-test                                  |
| Figure 1B | DP; UT vs d3 SL-TBI                                            | <0.0001  | ****     | T-test                                  |
|           | CD4+ SP; UT vs d3 SL-TBI                                       | <0.0001  | ****     | T-test                                  |
|           | CD8+ SP; UT vs d3 SL-TBI                                       | <0.0001  | ****     | T-test                                  |
| Figure 1C | LTi; UT vs d3 SL-TBI                                           | 0.009    | **       | T-test                                  |
| Figure 1D | CD4+ SP; UT vs d3 SL-TBI                                       | 0.0500   | *        | Mann Whitney test, two tailed           |
|           | LTi ; UT vs d3 SL-TBI                                          | 0.0143   | *        | Mann Whitney test, two tailed           |
|           | LTi ; UT vs d3 L-TBI                                           | 0.0143   | *        | Mann Whitney test, two tailed           |
| Figure 1E | WT UT vs WT d3 SL-TBI                                          | 0.003    | ***      | Mann Whitney test, one tailed           |
|           | WT d3 SL-TBI vs Rag2 <sup>-/-</sup> d3 SL-TBI                  | 0.0159   | *        | Mann Whitney test, one tailed           |
|           | Rag2 <sup>-/-</sup> d3 SL-TBI vs Rag2 <sup>-/-</sup> d3 SL-TBI | 0.0368   | *        | Mann Whitney test, one tailed           |
| Figure 1F | LTi ; d0 vs d3                                                 | 0.0006   | ***      | Mann Whitney test, two tailed           |
|           | LTi ; d0 vs d6                                                 | 0.0003   | ***      | Mann Whitney test, two tailed           |
|           | LTi ; d0 vs d10                                                | 0.0003   | ***      | Mann Whitney test, two tailed           |
|           | CD4+; d0 vs d3                                                 | 0.0006   | ***      | Mann Whitney test, two tailed           |
|           | CD4+ ; d0 vs d6                                                | 0.0003   | ***      | Mann Whitney test, two tailed           |
|           | CD4+; d0 vs d10                                                | 0.0197   | *        | Mann Whitney test, two tailed           |
|           | CD4+ SP vs LTi post-SL-TBI                                     | 0.0417   | *        | nonparametric Spearman correlation test |
| Figure 2A | Total TECs; UT vs PBS                                          | <0.0001  | ****     | Mann Whitney test, two tailed           |
|           | Total TECs; GST vs RANKL                                       | 0.0286   | *        | Mann Whitney test, two tailed           |
|           | Total TECs; isotype vs IK22/5                                  | 0.0286   | *        | Mann Whitney test, two tailed           |
|           | Total TECs; PBS vs IK22/5                                      | 0.0002   | ***      | Mann Whitney test, two tailed           |
|           | Total TECs; RANKL vs IK22/5                                    | 0.095    | *        | Mann Whitney test, two tailed           |
|           | cTECs; UT vs PBS                                               | 0.0007   | ***      | Mann Whitney test, two tailed           |
|           | cTECs; GST vs RANKL                                            | 0.0238   | *        | Mann Whitney test, two tailed           |
|           | cTECs; isotype vs IK22/5                                       | 0.0087   | **       | Mann Whitney test, two tailed           |
|           | cTECs; PBS vs IK22/5                                           | 0.0007   | ***      | Mann Whitney test, two tailed           |
|           | cTECs; RANKL vs IK22/5                                         | 0.0238   | *        | Mann Whitney test, two tailed           |
|           | mTECs; UT vs PBS                                               | 0.0007   | ***      | Mann Whitney test, two tailed           |
|           | mTECs; GST vs RANKL                                            | 0.0500   | *        | Mann Whitney test, two tailed           |
|           | mTECs; isotype vs IK22/5                                       | 0.0238   | *        | Mann Whitney test, two tailed           |
|           | mTECs; PBS vs IK22/5                                           | 0.0007   | ***      | Mann Whitney test, two tailed           |
|           | mTECs; RANKL vs IK22/5                                         | 0.0238   | *        | Mann Whitney test, two tailed           |
|           | CD80 <sup>lo</sup> Aire-; UT vs PBS                            | 0.0007   | ***      | Mann Whitney test, two tailed           |
|           | CD80 <sup>hi</sup> Aire-; UT vs PBS                            | 0.0004   | ***      | Mann Whitney test, two tailed           |
|           | CD80 <sup>hi</sup> Aire-; GST vs RANKL                         | 0.0167   | *        | Mann Whitney test, two tailed           |
|           | CD80 <sup>hi</sup> Aire-; isotype vs IK22/5                    | 0.0238   | *        | Mann Whitney test, two tailed           |
|           | CD80 <sup>hi</sup> Aire-; PBS vs IK22/5                        | 0.0004   | ***      | Mann Whitney test, two tailed           |
|           | CD80 <sup>hi</sup> Aire-; RANKL vs IK22/5                      | 0.0012   | **       | Mann Whitney test, two tailed           |
|           | CD80 <sup>hi</sup> Aire+; UT vs PBS                            | 0.0004   | ***      | Mann Whitney test, two tailed           |
|           | CD80 <sup>hi</sup> Aire+; GST vs RANKL                         | 0.0079   | **       | Mann Whitney test, two tailed           |
|           | CD80 <sup>hi</sup> Aire+; isotype vs IK22/5                    | 0.0238   | *        | Mann Whitney test, two tailed           |
|           | CD80 <sup>hi</sup> Aire+; PBS vs IK22/5                        | 0.0004   | ***      | Mann Whitney test, two tailed           |
|           | CD80 <sup>hi</sup> Aire+; RANKL vs IK22/5                      | 0.0043   | **       | Mann Whitney test, two tailed           |

Lopes *et al.* "Administration of RANK ligand boosts thymic regeneration upon bone marrow transplantation"

|           |                                               |        |     |                               |
|-----------|-----------------------------------------------|--------|-----|-------------------------------|
| Figure 2B | cTEChi; UT vs PBS                             | 0.0047 | **  | Mann Whitney test, two tailed |
|           | cTEChi; GST vs RANKL                          | 0.0500 | *   | Mann Whitney test, two tailed |
|           | cTEChi; isotype vs IK22/5                     | 0.0238 | *   | Mann Whitney test, two tailed |
|           | cTEChi; PBS vs IK22/5                         | 0.0007 | *** | Mann Whitney test, two tailed |
|           | cTEChi; RANKL vs IK22/5                       | 0.0238 | *   | Mann Whitney test, two tailed |
|           | mTEChi; UT vs PBS                             | 0.0007 | *** | Mann Whitney test, two tailed |
|           | mTEChi; GST vs RANKL                          | 0.0500 | *   | Mann Whitney test, two tailed |
|           | mTEChi; isotype vs IK22/5                     | 0.0476 | *   | Mann Whitney test, two tailed |
|           | mTEChi; PBS vs IK22/5                         | 0.0007 | *** | Mann Whitney test, two tailed |
|           | mTEChi; RANKL vs IK22/5                       | 0.0238 | *   | Mann Whitney test, two tailed |
|           | TEClo; UT vs PBS                              | 0.0007 | *** | Mann Whitney test, two tailed |
|           | TEClo; GST vs RANKL                           | 0.0500 | *   | Mann Whitney test, two tailed |
|           | TEClo; PBS vs IK22/5                          | 0.0047 | **  | Mann Whitney test, two tailed |
|           | TEClo; RANKL vs IK22/5                        | 0.0238 | *   | Mann Whitney test, two tailed |
|           | mTEClo; UT vs PBS                             | 0.0007 | *** | Mann Whitney test, two tailed |
|           | mTEClo; GST vs RANKL                          | 0.0500 | *   | Mann Whitney test, two tailed |
|           | mTEClo; isotype vs IK22/5                     | 0.0238 | *   | Mann Whitney test, two tailed |
|           | mTEClo; PBS vs IK22/5                         | 0.0080 | **  | Mann Whitney test, two tailed |
|           | mTEClo; RANKL vs IK22/5                       | 0.0238 | *   | Mann Whitney test, two tailed |
| Figure 2C | TEPC-enriched cells; UT vs PBS                | 0.0093 | **  | Mann Whitney test, two tailed |
|           | TEPC-enriched cells; GST vs RANKL             | 0.0500 | *   | Mann Whitney test, two tailed |
|           | TEPC-enriched cells; isotype vs IK22/5        | 0.0357 | *   | Mann Whitney test, two tailed |
|           | TEPC-enriched cells; PBS vs IK22/5            | 0.0016 | **  | Mann Whitney test, two tailed |
|           | TEPC-enriched cells; RANKL vs IK22/5          | 0.0357 | *   | Mann Whitney test, two tailed |
| Figure 2D | Ki-67+ cTECs; UT vs PBS                       | 0.0007 | *** | Mann Whitney test, two tailed |
|           | Ki-67+ cTECs; GST vs RANKL                    | 0.0500 | *   | Mann Whitney test, two tailed |
|           | Ki-67+ cTECs; isotype vs IK22/5               | 0.0022 | **  | Mann Whitney test, two tailed |
|           | Ki-67+ cTECs; PBS vs IK22/5                   | 0.0007 | *** | Mann Whitney test, two tailed |
|           | Ki-67+ cTECs; RANKL vs IK22/5                 | 0.0238 | *   | Mann Whitney test, two tailed |
|           | Ki-67+ mTECs; UT vs PBS                       | 0.0007 | *** | Mann Whitney test, two tailed |
|           | Ki-67+ mTECs; GST vs RANKL                    | 0.0500 | *   | Mann Whitney test, two tailed |
|           | Ki-67+ mTECs; isotype vs IK22/5               | 0.0022 | **  | Mann Whitney test, two tailed |
|           | Ki-67+ mTECs; PBS vs IK22/5                   | 0.0007 | *** | Mann Whitney test, two tailed |
|           | Ki-67+ mTECs; RANKL vs IK22/5                 | 0.0022 | **  | Mann Whitney test, two tailed |
|           | Ki-67+ TEPC-enriched cells; UT vs PBS         | 0.0127 | *   | Mann Whitney test, two tailed |
|           | Ki-67+ TEPC-enriched cells; GST vs RANKL      | 0.0500 | *   | Mann Whitney test, two tailed |
|           | Ki-67+ TEPC-enriched cells; isotype vs IK22/5 | 0.0238 | *   | Mann Whitney test, two tailed |
|           | Ki-67+ TEPC-enriched cells; PBS vs IK22/5     | 0.0077 | **  | Mann Whitney test, two tailed |
|           | Ki-67+ TEPC-enriched cells; RANKL vs IK22/5   | 0.0238 | *   | Mann Whitney test, two tailed |
| Figure 2E | Bax; cTECs; GST vs RANKL                      | 0.0500 | *   | Mann Whitney test, one tailed |
|           | Bcl-xl; cTECs; GST vs RANKL                   | 0.0500 | *   | Mann Whitney test, one tailed |
|           | Bax; mTECs; GST vs RANKL                      | 0.0500 | *   | Mann Whitney test, one tailed |
|           | Bid; mTECs; GST vs RANKL                      | 0.0500 | *   | Mann Whitney test, one tailed |
|           | Bad; mTECs; GST vs RANKL                      | 0.0500 | *   | Mann Whitney test, one tailed |
| Figure 2F | Aire; GST vs RANKL                            | 0.0004 | *** | T-test                        |
| Figure 2G | Aire; GST vs RANKL                            | 0.0500 | *   | Mann Whitney test, one tailed |
|           | SP1; GST vs RANKL                             | 0.0500 | *   | Mann Whitney test, one tailed |
|           | SP2; GST vs RANKL                             | 0.0500 | *   | Mann Whitney test, one tailed |
| Figure 2H | Selp; GST vs RANKL                            | 0.0500 | *   | Mann Whitney test, one tailed |

Lopes *et al.* "Administration of RANK ligand boosts thymic regeneration upon bone marrow transplantation"

|           |                                                                                                 |         |      |                                         |
|-----------|-------------------------------------------------------------------------------------------------|---------|------|-----------------------------------------|
|           | ICAM-1; GST vs RANKL                                                                            | 0.0500  | *    | Mann Whitney test, one tailed           |
|           | CCL21; GST vs RANKL                                                                             | 0.0500  | *    | Mann Whitney test, one tailed           |
| Figure 3A | UT vs SL-TBI                                                                                    | 0.0040  | **   | Mann Whitney test, two tailed           |
| Figure 3B | GST vs RANKL                                                                                    | 0.0286  | *    | Mann Whitney test, one tailed           |
| Figure 3C | LT $\alpha$ protein expression in hematopoietic cells after RANKL <i>in vivo</i> stimulation    | <0.0001 | **** | One-Way ANOVA                           |
| Figure 3D | UT vs PBS                                                                                       | 0.0022  | **   | Mann Whitney test, one tailed           |
|           | Isotype vs IK22/5                                                                               | 0.0500  | *    | Mann Whitney test, one tailed           |
| Figure 3E | LT $\alpha$ protein expression in hematopoietic cells after RANKL <i>in vivo</i> neutralization | 0.003   | ***  | One-Way ANOVA                           |
| Figure 3F | LT $\alpha$ mRNA; WT UT vs WT d3 SL-TBI                                                         | 0.0011  | **   | Mann Whitney test, two tailed           |
|           | LT $\alpha$ mRNA; ZAP-70 <sup>-/-</sup> UT vs ZAP-70 <sup>-/-</sup> d3 SL-TBI                   | 0.0011  | **   | Mann Whitney test, two tailed           |
| Figure 3H | RANKL vs LT $\alpha$ during the course of pBMT                                                  | 0.0100  | *    | nonparametric Spearman correlation test |
| Figure 3I | LT $\alpha$ protein; UT vs d3                                                                   | 0.0095  | **   | Mann Whitney test, two tailed           |
|           | LT $\alpha$ protein; UT vs d6                                                                   | 0.0095  | **   | Mann Whitney test, two tailed           |
| Figure 3J | LT $\alpha$ protein; d3; donor vs host                                                          | <0.0001 | **** | T-test                                  |
|           | LT $\alpha$ protein; d6; donor vs host                                                          | <0.0001 | **** | T-test                                  |
| Figure 3L | LT $\alpha$ mRNA; UT vs d3 SL-TBI                                                               | 0.0036  | **   | Mann Whitney test, one tailed           |
|           | LT $\beta$ mRNA; UT vs d3 SL-TBI                                                                | 0.0286  | *    | Mann Whitney test, one tailed           |
| Figure 3M | CD45 <sup>+</sup> ; UT vs d3 SL-TBI                                                             | 0.0022  | **   | Mann Whitney test, one tailed           |
| Figure 3N | LT $\alpha$ protein; UT vs d3 SL-TBI                                                            | 0.0022  | **   | Mann Whitney test, two tailed           |
|           | LT $\alpha$ protein; d3 SL-TBI vs d3 L-TBI                                                      | 0.0022  | **   | Mann Whitney test, two tailed           |
| Figure 3O | LT $\beta$ R-Fc; UT vs d3 SL-TBI                                                                | 0.0500  | *    | Mann Whitney test, one tailed           |
|           | LT $\beta$ R-Fc; d3 SL-TBI vs d3 L-TBI                                                          | 0.0500  | *    | Mann Whitney test, one tailed           |
| Figure 4A | TECs; UT vs d3 SL-TBI                                                                           | 0.0286  | *    | Mann Whitney test, two tailed           |
|           | cTECs; UT vs d3 SL-TBI                                                                          | 0.0286  | *    | Mann Whitney test, two tailed           |
|           | mTECs; UT vs d3 SL-TBI                                                                          | 0.0286  | *    | Mann Whitney test, two tailed           |
|           | TEPCs; UT vs d3 SL-TBI                                                                          | 0.0286  | *    | Mann Whitney test, two tailed           |
| Figure 4B | D10; WT CD45.1:WT vs WT CD45.1: LT $\alpha$ <sup>-/-</sup>                                      | 0.0143  | *    | Mann Whitney test, one tailed           |
|           | D21; WT CD45.1:WT vs WT CD45.1: LT $\alpha$ <sup>-/-</sup>                                      | 0.0143  | *    | Mann Whitney test, one tailed           |
|           | D65; WT CD45.1:WT vs WT CD45.1: LT $\alpha$ <sup>-/-</sup>                                      | 0.0040  | **   | Mann Whitney test, one tailed           |
| Figure 4C | cTECs; D21; WT CD45.1:WT vs WT CD45.1: LT $\alpha$ <sup>-/-</sup>                               | 0.0143  | *    | Mann Whitney test, one tailed           |
|           | cTECs; D65; WT CD45.1:WT vs WT CD45.1: LT $\alpha$ <sup>-/-</sup>                               | 0.0040  | **   | Mann Whitney test, one tailed           |
|           | mTECs; D10; WT CD45.1:WT vs WT CD45.1: LT $\alpha$ <sup>-/-</sup>                               | 0.0143  | *    | Mann Whitney test, one tailed           |
|           | mTECs; D21; WT CD45.1:WT vs WT CD45.1: LT $\alpha$ <sup>-/-</sup>                               | 0.0286  | *    | Mann Whitney test, one tailed           |
|           | mTECs; D65; WT CD45.1:WT vs WT CD45.1: LT $\alpha$ <sup>-/-</sup>                               | 0.0079  | **   | Mann Whitney test, one tailed           |
| Figure 4D | CD80loAire- mTECs; D10; WT CD45.1:WT vs WT CD45.1: LT $\alpha$ <sup>-/-</sup>                   | 0.0286  | *    | Mann Whitney test, one tailed           |
|           | CD80loAire- mTECs; D21; WT CD45.1:WT vs WT CD45.1: LT $\alpha$ <sup>-/-</sup>                   | 0.0143  | *    | Mann Whitney test, one tailed           |
|           | CD80loAire- mTECs; D65; WT CD45.1:WT vs WT CD45.1: LT $\alpha$ <sup>-/-</sup>                   | 0.0040  | **   | Mann Whitney test, one tailed           |
|           | CD80hiAire- mTECs; D10; WT CD45.1:WT vs WT CD45.1: LT $\alpha$ <sup>-/-</sup>                   | 0.0286  | *    | Mann Whitney test, one tailed           |
|           | CD80hiAire- mTECs; D21; WT CD45.1:WT vs WT CD45.1: LT $\alpha$ <sup>-/-</sup>                   | 0.0143  | *    | Mann Whitney test, one tailed           |
|           | CD80hiAire- mTECs; D65; WT CD45.1:WT vs WT CD45.1: LT $\alpha$ <sup>-/-</sup>                   | 0.0079  | **   | Mann Whitney test, one tailed           |

Lopes *et al.* "Administration of RANK ligand boosts thymic regeneration upon bone marrow transplantation"

|           |                                                                           |        |    |                               |
|-----------|---------------------------------------------------------------------------|--------|----|-------------------------------|
|           | CD80hiAire+ mTECs; D10; WT CD45.1:WT vs WT CD45.1: LT $\alpha$ -/-        | 0.0143 | *  | Mann Whitney test, one tailed |
|           | CD80hiAire+ mTECs; D21; WT CD45.1:WT vs WT CD45.1: LT $\alpha$ -/-        | 0.0143 | *  | Mann Whitney test, one tailed |
|           | CD80hiAire+ mTECs; D65; WT CD45.1:WT vs WT CD45.1: LT $\alpha$ -/-        | 0.0040 | ** | Mann Whitney test, one tailed |
| Figure 4E | cTEChi; D21; WT CD45.1:WT vs WT CD45.1: LT $\alpha$ -/-                   | 0.0500 | *  | Mann Whitney test, one tailed |
|           | cTEChi; D65; WT CD45.1:WT vs WT CD45.1: LT $\alpha$ -/-                   | 0.0143 | *  | Mann Whitney test, one tailed |
|           | mTEChi; D10; WT CD45.1:WT vs WT CD45.1: LT $\alpha$ -/-                   | 0.0143 | *  | Mann Whitney test, one tailed |
|           | mTEChi; D21; WT CD45.1:WT vs WT CD45.1: LT $\alpha$ -/-                   | 0.0500 | *  | Mann Whitney test, one tailed |
|           | mTEChi; D65; WT CD45.1:WT vs WT CD45.1: LT $\alpha$ -/-                   | 0.0179 | *  | Mann Whitney test, one tailed |
|           | TEClo; D10; WT CD45.1:WT vs WT CD45.1: LT $\alpha$ -/-                    | 0.0143 | *  | Mann Whitney test, one tailed |
|           | TEClo; D21; WT CD45.1:WT vs WT CD45.1: LT $\alpha$ -/-                    | 0.0500 | *  | Mann Whitney test, one tailed |
|           | TEClo; D65; WT CD45.1:WT vs WT CD45.1: LT $\alpha$ -/-                    | 0.0286 | *  | Mann Whitney test, one tailed |
|           | mTEClo; D10; WT CD45.1:WT vs WT CD45.1: LT $\alpha$ -/-                   | 0.0143 | *  | Mann Whitney test, one tailed |
|           | mTEClo; D21; WT CD45.1:WT vs WT CD45.1: LT $\alpha$ -/-                   | 0.0500 | *  | Mann Whitney test, one tailed |
|           | mTEClo; D65; WT CD45.1:WT vs WT CD45.1: LT $\alpha$ -/-                   | 0.0079 | ** | Mann Whitney test, one tailed |
| Figure 4F | TEPC-enriched cells; D10; WT CD45.1:WT vs WT CD45.1: LT $\alpha$ -/-      | 0.0143 | *  | Mann Whitney test, one tailed |
|           | TEPC-enriched cells; D21; WT CD45.1:WT vs WT CD45.1: LT $\alpha$ -/-      | 0.0079 | ** | Mann Whitney test, one tailed |
|           | TEPC-enriched cells; D65; WT CD45.1:WT vs WT CD45.1: LT $\alpha$ -/-      | 0.0286 | *  | Mann Whitney test, one tailed |
| Figure 4G | Total TECs; D21; WT CD45.1:WT vs WT CD45.1: LT $\alpha$ -/-               | 0.0286 | *  | Mann Whitney test, one tailed |
|           | Total TECs; D65; WT CD45.1:WT vs WT CD45.1: LT $\alpha$ -/-               | 0.0040 | ** | Mann Whitney test, one tailed |
|           | cTECs; D10; WT CD45.1:WT vs WT CD45.1: LT $\alpha$ -/-                    | 0.0500 | *  | Mann Whitney test, one tailed |
|           | cTECs; D21; WT CD45.1:WT vs WT CD45.1: LT $\alpha$ -/-                    | 0.0143 | *  | Mann Whitney test, one tailed |
|           | cTECs; D65; WT CD45.1:WT vs WT CD45.1: LT $\alpha$ -/-                    | 0.0040 | ** | Mann Whitney test, one tailed |
|           | mTECs; D10; WT CD45.1:WT vs WT CD45.1: LT $\alpha$ -/-                    | 0.0143 | *  | Mann Whitney test, one tailed |
|           | mTECs; D21; WT CD45.1:WT vs WT CD45.1: LT $\alpha$ -/-                    | 0.0143 | *  | Mann Whitney test, one tailed |
|           | mTECs; D65; WT CD45.1:WT vs WT CD45.1: LT $\alpha$ -/-                    | 0.0040 | ** | Mann Whitney test, one tailed |
|           | TEPC-enriched cells; D10; WT CD45.1:WT vs WT CD45.1: LT $\alpha$ -/-      | 0.0286 | *  | Mann Whitney test, one tailed |
|           | TEPC-enriched cells; D21; WT CD45.1:WT vs WT CD45.1: LT $\alpha$ -/-      | 0.0079 | ** | Mann Whitney test, one tailed |
|           | TEPC-enriched cells; D65; WT CD45.1:WT vs WT CD45.1: LT $\alpha$ -/-      | 0.0286 | *  | Mann Whitney test, one tailed |
| Figure 4H | Aire; WT CD45.1:WT vs WT CD45.1: LT $\alpha$ -/-                          | 0.0500 | *  | Mann Whitney test, one tailed |
|           | SP1; WT CD45.1:WT vs WT CD45.1: LT $\alpha$ -/-                           | 0.0286 | *  | Mann Whitney test, one tailed |
|           | SP2; WT CD45.1:WT vs WT CD45.1: LT $\alpha$ -/-                           | 0.0143 | *  | Mann Whitney test, one tailed |
|           | Casein $\beta$ ; WT CD45.1:WT vs WT CD45.1: LT $\alpha$ -/-               | 0.0143 | *  | Mann Whitney test, one tailed |
|           | Fezf2; WT CD45.1:WT vs WT CD45.1: LT $\alpha$ -/-                         | 0.0143 | *  | Mann Whitney test, one tailed |
|           | Apoc3; WT CD45.1:WT vs WT CD45.1: LT $\alpha$ -/-                         | 0.0143 | *  | Mann Whitney test, one tailed |
|           | Fabp9; WT CD45.1:WT vs WT CD45.1: LT $\alpha$ -/-                         | 0.0143 | *  | Mann Whitney test, one tailed |
|           | Resp18; WT CD45.1:WT vs WT CD45.1: LT $\alpha$ -/-                        | 0.0143 | *  | Mann Whitney test, one tailed |
| Figure 5A | CD45.1 total donor cells; D10; WT CD45.1:WT vs WT CD45.1: LT $\alpha$ -/- | 0.0061 | ** | Mann Whitney test, one tailed |

Lopes *et al.* "Administration of RANK ligand boosts thymic regeneration upon bone marrow transplantation"

|           |                                                                           |        |     |                               |
|-----------|---------------------------------------------------------------------------|--------|-----|-------------------------------|
|           | CD45.1 total donor cells; D21; WT CD45.1:WT vs WT CD45.1: LT $\alpha$ -/- | 0.0006 | *** | Mann Whitney test, one tailed |
|           | CD45.1 total donor cells; D65; WT CD45.1:WT vs WT CD45.1: LT $\alpha$ -/- | 0.0010 | *** | Mann Whitney test, one tailed |
|           | DN; D10; WT CD45.1:WT vs WT CD45.1: LT $\alpha$ -/-                       | 0.0500 | *   | Mann Whitney test, one tailed |
|           | DN; D21; WT CD45.1:WT vs WT CD45.1: LT $\alpha$ -/-                       | 0.0143 | *   | Mann Whitney test, one tailed |
|           | DN; D65; WT CD45.1:WT vs WT CD45.1: LT $\alpha$ -/-                       | 0.0486 | *   | Mann Whitney test, one tailed |
|           | DP; D10; WT CD45.1:WT vs WT CD45.1: LT $\alpha$ -/-                       | 0.0384 | *   | Mann Whitney test, one tailed |
|           | DP; D21; WT CD45.1:WT vs WT CD45.1: LT $\alpha$ -/-                       | 0.0014 | **  | Mann Whitney test, one tailed |
|           | DP; D65; WT CD45.1:WT vs WT CD45.1: LT $\alpha$ -/-                       | 0.0023 | **  | Mann Whitney test, one tailed |
|           | CD4+ SP; D10; WT CD45.1:WT vs WT CD45.1: LT $\alpha$ -/-                  | 0.0500 | *   | Mann Whitney test, one tailed |
|           | CD4+ SP; D21; WT CD45.1:WT vs WT CD45.1: LT $\alpha$ -/-                  | 0.0143 | *   | Mann Whitney test, one tailed |
|           | CD4+ SP; D65; WT CD45.1:WT vs WT CD45.1: LT $\alpha$ -/-                  | 0.0079 | **  | Mann Whitney test, one tailed |
|           | CD8+ SP; D21; WT CD45.1:WT vs WT CD45.1: LT $\alpha$ -/-                  | 0.0143 | *   | Mann Whitney test, one tailed |
|           | CD8+ SP; D65; WT CD45.1:WT vs WT CD45.1: LT $\alpha$ -/-                  | 0.0079 | **  | Mann Whitney test, one tailed |
| Figure 5B | DN1; D10; WT CD45.1:WT vs WT CD45.1: LT $\alpha$ -/-                      | 0.0500 | *   | Mann Whitney test, one tailed |
|           | DN1; D21; WT CD45.1:WT vs WT CD45.1: LT $\alpha$ -/-                      | 0.0143 | *   | Mann Whitney test, one tailed |
|           | DN2; D10; WT CD45.1:WT vs WT CD45.1: LT $\alpha$ -/-                      | 0.0500 | *   | Mann Whitney test, one tailed |
|           | DN2; D21; WT CD45.1:WT vs WT CD45.1: LT $\alpha$ -/-                      | 0.0179 | *   | Mann Whitney test, one tailed |
|           | DN3; D10; WT CD45.1:WT vs WT CD45.1: LT $\alpha$ -/-                      | 0.0500 | *   | Mann Whitney test, one tailed |
|           | DN3; D21; WT CD45.1:WT vs WT CD45.1: LT $\alpha$ -/-                      | 0.0286 | *   | Mann Whitney test, one tailed |
|           | DN4; D10; WT CD45.1:WT vs WT CD45.1: LT $\alpha$ -/-                      | 0.0500 | *   | Mann Whitney test, one tailed |
|           | DN4; D21; WT CD45.1:WT vs WT CD45.1: LT $\alpha$ -/-                      | 0.0143 | *   | Mann Whitney test, one tailed |
| Figure 5C | Thymic ETPs; WT CD45.1:WT vs WT CD45.1: LT $\alpha$ -/-                   | 0.0143 | *   | Mann Whitney test, one tailed |
| Figure 5D | CCL19; TECs; WT CD45.1:WT vs WT CD45.1: LT $\alpha$ -/-                   | 0.0008 | *** | T-test                        |
|           | CCL19; Fibroblasts; WT CD45.1:WT vs WT CD45.1: LT $\alpha$ -/-            | 0.0015 | **  | T-test                        |
|           | CCL21; TECs; WT CD45.1:WT vs WT CD45.1: LT $\alpha$ -/-                   | 0.0023 | **  | T-test                        |
|           | CCL21; Fibroblasts; WT CD45.1:WT vs WT CD45.1: LT $\alpha$ -/-            | 0.0396 | *   | T-test                        |
|           | ICAM-1; Endothelial cells; WT CD45.1:WT vs WT CD45.1: LT $\alpha$ -/-     | 0.0394 | *   | T-test                        |
|           | VCAM-1; Endothelial cells; WT CD45.1:WT vs WT CD45.1: LT $\alpha$ -/-     | 0.0011 | **  | T-test                        |
|           | Selp; Endothelial cells; WT CD45.1:WT vs WT CD45.1: LT $\alpha$ -/-       | 0.0092 | **  | T-test                        |
| Figure 5E | CD45.1 ETPs; WT CD45.1:WT vs WT CD45.1: LT $\alpha$ -/-                   | 0.0011 | **  | Mann Whitney test, one tailed |
|           | CD45.1 donor cells; WT CD45.1:WT vs WT CD45.1: LT $\alpha$ -/-            | 0.0011 | **  | Mann Whitney test, one tailed |
| Figure 5F | IL-22; WT; UT vs d3 SL-TBI                                                | 0.0362 | *   | T-test                        |
|           | IL-22; LT $\alpha$ -/-; UT vs d3 SL-TBI                                   | 0.0096 | **  | T-test                        |
| Figure 5G | IL-23; total thymus; WT; UT vs d3 SL-TBI                                  | 0.0117 | *   | T-test                        |
|           | IL-23; total thymus; LT $\alpha$ -/-; UT vs d3 SL-TBI                     | 0.0172 | *   | T-test                        |
|           | IL-23; purified DCs; WT; UT vs d3 SL-TBI                                  | 0.0011 | **  | T-test                        |
|           | IL-23; purified DCs; LT $\alpha$ -/-; UT vs d3 SL-TBI                     | 0.0184 | *   | T-test                        |
| Figure 6B | GST vs RANKL-GST                                                          | 0.0184 | *   | T-test                        |
| Figure 6C | WT CD45.1:WT GST vs WT CD45.1:WT RANKL                                    | 0.0178 | *   | T-test                        |
| Figure 6D | Total TECs; WT CD45.1:WT GST vs WT CD45.1: WT RANKL                       | 0.0003 | *** | T-test                        |



Lopes *et al.* "Administration of RANK ligand boosts thymic regeneration upon bone marrow transplantation"

|           |                                                                                                             |         |      |        |
|-----------|-------------------------------------------------------------------------------------------------------------|---------|------|--------|
|           | Total TECs; WT CD45.1:LT $\alpha$ <sup>-/-</sup> GST vs WT CD45.1:LT $\alpha$ <sup>-/-</sup> RANKL          | 0.0002  | ***  | T-test |
|           | cTECs; WT CD45.1:WT GST vs WT CD45.1:WT RANKL                                                               | 0.0002  | ***  | T-test |
|           | cTECs; WT CD45.1:WT RANKL vs WT CD45.1:LT $\alpha$ <sup>-/-</sup> RANKL                                     | 0.0015  | **   | T-test |
|           | cTECs; WT CD45.1:LT $\alpha$ <sup>-/-</sup> GST vs WT CD45.1:LT $\alpha$ <sup>-/-</sup> RANKL               | <0.0001 | **** | T-test |
|           | mTECs; WT CD45.1:WT GST vs WT CD45.1:WT RANKL                                                               | <0.0001 | **** | T-test |
|           | mTECs; WT CD45.1:LT $\alpha$ <sup>-/-</sup> GST vs WT CD45.1:LT $\alpha$ <sup>-/-</sup> RANKL               | 0.0007  | ***  | T-test |
| Figure 6E | WT CD45.1:WT GST vs WT CD45.1:WT RANKL                                                                      | 0.0007  | ***  | T-test |
|           | WT CD45.1:WT RANKL vs WT CD45.1:LT $\alpha$ <sup>-/-</sup> RANKL                                            | <0.0001 | **** | T-test |
| Figure 6F | SP1; WT CD45.1:WT GST vs WT CD45.1:WT RANKL                                                                 | 0.0015  | **   | T-test |
|           | SP1; WT CD45.1:WT RANKL vs WT CD45.1:LT $\alpha$ <sup>-/-</sup> RANKL                                       | 0.0315  | *    | T-test |
|           | SP2; WT CD45.1:WT GST vs WT CD45.1:WT RANKL                                                                 | 0.0315  | *    | T-test |
|           | SP2; WT CD45.1:WT RANKL vs WT CD45.1:LT $\alpha$ <sup>-/-</sup> RANKL                                       | 0.0140  | *    | T-test |
| Figure 6G | CD45.1 total cells - WT CD45.1:WT GST vs WT CD45.1:WT RANKL                                                 | 0.0003  | ***  | T-test |
|           | CD45.1 total cells - WT CD45.1:WT RANKL vs WT CD45.1:LT $\alpha$ <sup>-/-</sup> RANKL                       | 0.0014  | **   | T-test |
|           | CD45.1 total cells - WT CD45.1:LT $\alpha$ <sup>-/-</sup> GST vs WT CD45.1:LT $\alpha$ <sup>-/-</sup> RANKL | 0.0260  | *    | T-test |
|           | Thymic ETPs - WT CD45.1:WT GST vs WT CD45.1:WT RANKL                                                        | 0.0004  | ***  | T-test |
|           | Thymic ETPs - WT CD45.1:WT RANKL vs WT CD45.1:LT $\alpha$ <sup>-/-</sup> RANKL                              | 0.0367  | *    | T-test |
|           | Thymic ETPs - WT CD45.1:LT $\alpha$ <sup>-/-</sup> GST vs WT CD45.1:LT $\alpha$ <sup>-/-</sup> RANKL        | 0.0312  | *    | T-test |
|           | DN - WT CD45.1:WT GST vs WT CD45.1:WT RANKL                                                                 | 0.0495  | *    | T-test |
|           | DN - WT CD45.1:WT RANKL vs WT CD45.1:LT $\alpha$ <sup>-/-</sup> RANKL                                       | 0.0443  | *    | T-test |
|           | DP - WT CD45.1:WT GST vs WT CD45.1:WT RANKL                                                                 | 0.0040  | **   | T-test |
|           | DP - WT CD45.1:WT RANKL vs WT CD45.1:LT $\alpha$ <sup>-/-</sup> RANKL                                       | 0.0009  | ***  | T-test |
|           | CD4+ SP - WT CD45.1:WT GST vs WT CD45.1:WT RANKL                                                            | 0.0005  | ***  | T-test |
|           | CD4+ SP - WT CD45.1:WT RANKL vs WT CD45.1:LT $\alpha$ <sup>-/-</sup> RANKL                                  | 0.0003  | ***  | T-test |
|           | CD4+ SP - WT CD45.1:LT $\alpha$ <sup>-/-</sup> GST vs WT CD45.1:LT $\alpha$ <sup>-/-</sup> RANKL            | 0.0346  | *    | T-test |
|           | CD8+ SP - WT CD45.1:WT GST vs WT CD45.1:WT RANKL                                                            | 0.0185  | *    | T-test |
|           | CD8+ SP - WT CD45.1:WT RANKL vs WT CD45.1:LT $\alpha$ <sup>-/-</sup> RANKL                                  | 0.0013  | **   | T-test |
| Figure 6H | Thymic ETPs – UT vs WT CD45.1:WT PBS                                                                        | 0.0346  | *    | T-test |

Lopes *et al.* "Administration of RANK ligand boosts thymic regeneration upon bone marrow transplantation"

|           |                                                                                               |         |      |                               |
|-----------|-----------------------------------------------------------------------------------------------|---------|------|-------------------------------|
|           | Thymic ETPs - WT CD45.1:WT GST vs WT CD45.1:WT RANKL                                          | 0.0185  | *    | T-test                        |
|           | BM prethymic progenitors - UT vs WT CD45.1:WT PBS                                             | 0.0003  | ***  | T-test                        |
| Figure 7A | Total TECs; WT CD45.1:WT GST vs WT CD45.1:WT RANKL                                            | 0.0476  | *    | Mann Whitney test, one tailed |
|           | cTECs; WT CD45.1:WT GST vs WT CD45.1:WT RANKL                                                 | 0.0476  | *    | Mann Whitney test, one tailed |
|           | mTECs; WT CD45.1:WT GST vs WT CD45.1:WT RANKL                                                 | 0.0476  | *    | Mann Whitney test, one tailed |
| Figure 7B | WT CD45.1:WT GST vs WT CD45.1:WT RANKL                                                        | 0.0476  | *    | Mann Whitney test, one tailed |
| Figure 7C | CD45.1 total donor cells; WT CD45.1:WT GST vs WT CD45.1:WT RANKL                              | 0.0262  | *    | Mann Whitney test, one tailed |
|           | DN; WT CD45.1:WT GST vs WT CD45.1:WT RANKL                                                    | 0.0476  | *    | Mann Whitney test, one tailed |
|           | DP; WT CD45.1:WT GST vs WT CD45.1:WT RANKL                                                    | 0.0476  | *    | Mann Whitney test, one tailed |
|           | CD4+ SP; WT CD45.1:WT GST vs WT CD45.1:WT RANKL                                               | 0.0476  | *    | Mann Whitney test, one tailed |
|           | CD8+ SP; WT CD45.1:WT GST vs WT CD45.1:WT RANKL                                               | 0.0476  | *    | Mann Whitney test, one tailed |
| Figure 7D | ETPs; WT CD45.1:WT GST vs WT CD45.1:WT RANKL                                                  | 0.0476  | *    | Mann Whitney test, one tailed |
|           |                                                                                               |         |      |                               |
| EV1A      | GST vs RANKL                                                                                  | 0.0143  | *    | Mann Whitney test, two tailed |
|           | RANKL vs RANK-Fc                                                                              | 0.0143  | *    | Mann Whitney test, two tailed |
| EV1B      | LT $\alpha$ protein expression in hematopoietic cells after RANKL <i>in vitro</i> stimulation | <0.0001 | **** | One-Way ANOVA                 |
| EV2A      | cTECs; WT vs LT $\alpha$ <sup>-/-</sup>                                                       | 0.0175  | *    | Mann Whitney test, two tailed |
|           | mTECs; WT vs LT $\alpha$ <sup>-/-</sup>                                                       | 0.0012  | **   | Mann Whitney test, two tailed |
| EV2B      | CD80 <sup>lo</sup> Aire <sup>-</sup> mTECs; WT vs LT $\alpha$ <sup>-/-</sup>                  | 0.0221  | *    | Mann Whitney test, two tailed |
|           | CD80 <sup>hi</sup> Aire <sup>-</sup> mTECs; WT vs LT $\alpha$ <sup>-/-</sup>                  | 0.0012  | **   | Mann Whitney test, two tailed |
|           | CD80 <sup>hi</sup> Aire <sup>+</sup> mTECs; WT vs LT $\alpha$ <sup>-/-</sup>                  | 0.0041  | **   | Mann Whitney test, two tailed |
| EV2C      | WT vs LT $\alpha$ <sup>-/-</sup>                                                              | 0.0004  | ***  | T-test                        |
| EV3A      | CD4+; d21; WT CD45.1:WT vs WT CD45.1: LT $\alpha$ <sup>-/-</sup>                              | 0.0286  | *    | Mann Whitney test, one tailed |
|           | CD4+; d65; WT CD45.1:WT vs WT CD45.1: LT $\alpha$ <sup>-/-</sup>                              | 0.0159  | *    | Mann Whitney test, one tailed |
|           | CD4+; d100; WT CD45.1:WT vs WT CD45.1: LT $\alpha$ <sup>-/-</sup>                             | 0.0317  | *    | Mann Whitney test, one tailed |
|           | CD8+; d21; WT CD45.1:WT vs WT CD45.1: LT $\alpha$ <sup>-/-</sup>                              | 0.0143  | *    | Mann Whitney test, one tailed |
|           | CD8+; d65; WT CD45.1:WT vs WT CD45.1: LT $\alpha$ <sup>-/-</sup>                              | 0.0159  | *    | Mann Whitney test, one tailed |
|           | CD8+; d100; WT CD45.1:WT vs WT CD45.1: LT $\alpha$ <sup>-/-</sup>                             | 0.0159  | *    | Mann Whitney test, one tailed |
| EV3B      | Foxp3+ Tregs; d21; WT CD45.1:WT vs WT CD45.1: LT $\alpha$ <sup>-/-</sup>                      | 0.0143  | *    | Mann Whitney test, one tailed |
|           | Foxp3+ Tregs; d65; WT CD45.1:WT vs WT CD45.1: LT $\alpha$ <sup>-/-</sup>                      | 0.0079  | **   | Mann Whitney test, one tailed |
|           | Foxp3+ Tregs; d100; WT CD45.1:WT vs WT CD45.1: LT $\alpha$ <sup>-/-</sup>                     | 0.0079  | **   | Mann Whitney test, one tailed |
| EV3C      | CD4+; d21; WT CD45.1:WT vs WT CD45.1: LT $\alpha$ <sup>-/-</sup>                              | 0.0286  | *    | Mann Whitney test, one tailed |
|           | CD4+; d65; WT CD45.1:WT vs WT CD45.1: LT $\alpha$ <sup>-/-</sup>                              | 0.0079  | **   | Mann Whitney test, one tailed |
|           | CD4+; d100; WT CD45.1:WT vs WT CD45.1: LT $\alpha$ <sup>-/-</sup>                             | 0.0079  | **   | Mann Whitney test, one tailed |
|           | CD8+; d21; WT CD45.1:WT vs WT CD45.1: LT $\alpha$ <sup>-/-</sup>                              | 0.0286  | *    | Mann Whitney test, one tailed |
|           | CD8+; d65; WT CD45.1:WT vs WT CD45.1: LT $\alpha$ <sup>-/-</sup>                              | 0.0079  | **   | Mann Whitney test, one tail   |
|           | CD8+; d100; WT CD45.1:WT vs WT CD45.1: LT $\alpha$ <sup>-/-</sup>                             | 0.0286  | *    | Mann Whitney test, one tailed |

Lopes *et al.* "Administration of RANK ligand boosts thymic regeneration upon bone marrow transplantation"

|      |                                                                                       |        |     |                               |
|------|---------------------------------------------------------------------------------------|--------|-----|-------------------------------|
| EV3D | Foxp3+ Tregs; d21; WT CD45.1:WT vs WT CD45.1: LT $\alpha$ -/-                         | 0.0500 | *   | Mann Whitney test, one tailed |
|      | Foxp3+ Tregs; d65; WT CD45.1:WT vs WT CD45.1: LT $\alpha$ -/-                         | 0.0079 | **  | Mann Whitney test, one tailed |
|      | Foxp3+ Tregs; d100; WT CD45.1:WT vs WT CD45.1: LT $\alpha$ -/-                        | 0.0079 | **  | Mann Whitney test, one tailed |
| EV3E | CD4+; WT CD45.1:WT vs WT CD45.1: LT $\alpha$ -/-                                      | 0.0500 | *   | Mann Whitney test, one tailed |
|      | CD8+; WT CD45.1:WT vs WT CD45.1: LT $\alpha$ -/-                                      | 0.0500 | *   | Mann Whitney test, one tailed |
| EV3F | CD4+; WT CD45.1:WT vs WT CD45.1: LT $\alpha$ -/-                                      | 0.0028 | **  | Mann Whitney test, one tailed |
|      | CD8+; WT CD45.1:WT vs WT CD45.1: LT $\alpha$ -/-                                      | 0.0079 | **  | Mann Whitney test, one tailed |
| EV4  | CD45.1 total donor cells; d21; WT CD45.1:WT GST vs WT CD45.1:WT RANKL                 | 0.0006 | *** | Mann Whitney test, one tailed |
|      | CD45.1 total donor cells; d21; WT CD45.1:WT RANKL vs WT CD45.1: LT $\alpha$ -/- RANKL | 0.0006 | *** | Mann Whitney test, one tailed |
|      | CD45.1 total donor cells; d65; WT CD45.1:WT GST vs WT CD45.1:WT RANKL                 | 0.0500 | *   | Mann Whitney test, one tailed |
|      | CD45.1 total donor cells; d65; WT CD45.1:WT RANKL vs WT CD45.1: LT $\alpha$ -/- RANKL | 0.0500 | *   | Mann Whitney test, one tailed |
|      | CD8+ T cells; d21; WT CD45.1:WT GST vs WT CD45.1:WT RANKL                             | 0.0002 | *** | Mann Whitney test, one tailed |
|      | CD8+ T cells; d21; WT CD45.1:WT RANKL vs WT CD45.1: LT $\alpha$ -/- RANKL             | 0.0119 | *   | Mann Whitney test, one tailed |
|      | CD8+ T cells; d65; WT CD45.1:WT GST vs WT CD45.1:WT RANKL                             | 0.0500 | *   | Mann Whitney test, one tailed |
|      | CD8+ T cells; d65; WT CD45.1:WT RANKL vs WT CD45.1: LT $\alpha$ -/- RANKL             | 0.0500 | *   | Mann Whitney test, one tailed |
|      | CD4+ T cells; d21; WT CD45.1:WT GST vs WT CD45.1:WT RANKL                             | 0.0095 | **  | Mann Whitney test, one tailed |
|      | CD4+ T cells; d21; WT CD45.1:WT RANKL vs WT CD45.1: LT $\alpha$ -/- RANKL             | 0.0179 | *   | Mann Whitney test, one tailed |
|      | CD4+ T cells; d65; WT CD45.1:WT GST vs WT CD45.1:WT RANKL                             | 0.0500 | *   | Mann Whitney test, one tailed |
|      | CD4+ T cells; d65; WT CD45.1:WT RANKL vs WT CD45.1: LT $\alpha$ -/- RANKL             | 0.0500 | *   | Mann Whitney test, one tailed |
|      | Foxp3+ Tregs; d21; WT CD45.1:WT GST vs WT CD45.1:WT RANKL                             | 0.0213 | *   | Mann Whitney test, one tailed |
|      | Foxp3+ Tregs; d21; WT CD45.1:WT RANKL vs WT CD45.1: LT $\alpha$ -/- RANKL             | 0.0213 | *   | Mann Whitney test, one tailed |
|      | Foxp3+ Tregs; d65; WT CD45.1:WT GST vs WT CD45.1:WT RANKL                             | 0.0500 | *   | Mann Whitney test, one tailed |
|      | Foxp3+ Tregs; d65; WT CD45.1:WT RANKL vs WT CD45.1: LT $\alpha$ -/- RANKL             | 0.0500 | *   | Mann Whitney test, one tailed |
| EV5B | UT vs d3 SL-TBI                                                                       | 0.0500 | *   | Mann Whitney test, one tailed |
| EV5C | Total TECs; WT CD45.1:WT vs WT CD45.1: LT $\alpha$ -/-                                | 0.0022 | **  | Mann Whitney test, one tailed |
|      | cTECs; WT CD45.1:WT vs WT CD45.1: LT $\alpha$ -/-                                     | 0.0152 | *   | Mann Whitney test, one tailed |
|      | mTECs; WT CD45.1:WT vs WT CD45.1: LT $\alpha$ -/-                                     | 0.0022 | **  | Mann Whitney test, one tailed |

Lopes *et al.* "Administration of RANK ligand boosts thymic regeneration upon bone marrow transplantation"

|                     |                                                                                                 |        |    |                               |
|---------------------|-------------------------------------------------------------------------------------------------|--------|----|-------------------------------|
| EV5D                | Total TECs; WT CD45.1:WT vs WT CD45.1: LT $\alpha$ <sup>-/-</sup>                               | 0.0011 | ** | Mann Whitney test, one tailed |
|                     | cTECs; WT CD45.1:WT vs WT CD45.1: LT $\alpha$ <sup>-/-</sup>                                    | 0.0500 | *  | Mann Whitney test, one tailed |
|                     | mTECs; WT CD45.1:WT vs WT CD45.1: LT $\alpha$ <sup>-/-</sup>                                    | 0.0011 | ** | Mann Whitney test, one tailed |
| EV5E                | CD80loAire <sup>-</sup> mTECs; WT CD45.1:WT vs WT CD45.1: LT $\alpha$ <sup>-/-</sup>            | 0.0048 | ** | Mann Whitney test, one tailed |
|                     | CD80hiAire <sup>-</sup> mTECs; WT CD45.1:WT vs WT CD45.1: LT $\alpha$ <sup>-/-</sup>            | 0.0152 | *  | Mann Whitney test, one tailed |
|                     | CD80hiAire <sup>+</sup> mTECs; WT CD45.1:WT vs WT CD45.1: LT $\alpha$ <sup>-/-</sup>            | 0.0130 | *  | Mann Whitney test, one tailed |
| EV5F                | CD45.1 total donor cells; WT CD45.1:WT vs WT CD45.1: LT $\alpha$ <sup>-/-</sup>                 | 0.0043 | ** | Mann Whitney test, one tailed |
|                     | DN; WT CD45.1:WT vs WT CD45.1: LT $\alpha$ <sup>-/-</sup>                                       | 0.0500 | *  | Mann Whitney test, one tailed |
|                     | DP; WT CD45.1:WT vs WT CD45.1: LT $\alpha$ <sup>-/-</sup>                                       | 0.0500 | *  | Mann Whitney test, one tailed |
|                     | CD4 <sup>+</sup> SP; WT CD45.1:WT vs WT CD45.1: LT $\alpha$ <sup>-/-</sup>                      | 0.0278 | *  | Mann Whitney test, one tailed |
|                     | CD8 <sup>+</sup> SP; WT CD45.1:WT vs WT CD45.1: LT $\alpha$ <sup>-/-</sup>                      | 0.0011 | ** | Mann Whitney test, one tailed |
| EV5G                | ETPs; WT CD45.1:WT vs WT CD45.1: LT $\alpha$ <sup>-/-</sup>                                     | 0.0500 | *  | Mann Whitney test, one tailed |
| EV5H                | CD4 <sup>+</sup> T cells; WT CD45.1:WT vs WT CD45.1: LT $\alpha$ <sup>-/-</sup>                 | 0.0152 | *  | Mann Whitney test, one tailed |
| EV5I                | Foxp3 <sup>+</sup> Tregs; WT CD45.1:WT vs WT CD45.1: LT $\alpha$ <sup>-/-</sup>                 | 0.0043 | ** | Mann Whitney test, one tailed |
| EV5J                | CD4 <sup>+</sup> T cells; WT CD45.1:WT vs WT CD45.1: LT $\alpha$ <sup>-/-</sup>                 | 0.0119 | *  | Mann Whitney test, one tailed |
|                     | CD8 <sup>+</sup> T cells; WT CD45.1:WT vs WT CD45.1: LT $\alpha$ <sup>-/-</sup>                 | 0.0130 | *  | Mann Whitney test, one tailed |
| EV5K                | Foxp3 <sup>+</sup> Tregs; WT CD45.1:WT vs WT CD45.1: LT $\alpha$ <sup>-/-</sup>                 | 0.0119 | *  | Mann Whitney test, one tailed |
|                     |                                                                                                 |        |    |                               |
| Appendix Figure S3  | WT CD45.1:WT vs WT CD45.1: LT $\alpha$ <sup>-/-</sup>                                           | 0.0227 | *  | T-test                        |
| Appendix Figure S4B | Total TECs; WT CD45.1:WT GST vs WT CD45.1:WT RANKL                                              | 0.0500 | *  | Mann Whitney test, one tailed |
|                     | Total TECs; WT CD45.1:WT RANKL vs WT CD45.1: LT $\alpha$ <sup>-/-</sup> RANKL                   | 0.0500 | *  | Mann Whitney test, one tailed |
|                     | cTECs; WT CD45.1:WT GST vs WT CD45.1:WT RANKL                                                   | 0.0500 | *  | Mann Whitney test, one tailed |
|                     | cTECs; WT CD45.1:WT RANKL vs WT CD45.1: LT $\alpha$ <sup>-/-</sup> RANKL                        | 0.0500 | *  | Mann Whitney test, one tailed |
|                     | cTECs; WT CD45.1: LT $\alpha$ <sup>-/-</sup> GST vs WT CD45.1: LT $\alpha$ <sup>-/-</sup> RANKL | 0.0500 | *  | Mann Whitney test, one tailed |
|                     | mTECs; WT CD45.1:WT GST vs WT CD45.1:WT RANKL                                                   | 0.0500 | *  | Mann Whitney test, one tailed |
|                     | mTECs; WT CD45.1:WT RANKL vs WT CD45.1: LT $\alpha$ <sup>-/-</sup> RANKL                        | 0.0500 | *  | Mann Whitney test, one tailed |
| Appendix Figure S4C | CD45.1 total donor cells; WT CD45.1:WT GST vs WT CD45.1:WT RANKL                                | 0.0500 | *  | Mann Whitney test, one tailed |
|                     | CD45.1 total donor cells; WT CD45.1:WT RANKL vs WT CD45.1: LT $\alpha$ <sup>-/-</sup> RANKL     | 0.0500 | *  | Mann Whitney test, one tailed |
|                     | Thymic ETPs; WT CD45.1:WT GST vs WT CD45.1:WT RANKL                                             | 0.0500 | *  | Mann Whitney test, one tailed |
|                     | Thymic ETPs; WT CD45.1:WT RANKL vs WT CD45.1: LT $\alpha$ <sup>-/-</sup> RANKL                  | 0.0500 | *  | Mann Whitney test, one tailed |
|                     | DN; WT CD45.1:WT GST vs WT CD45.1:WT RANKL                                                      | 0.0500 | *  | Mann Whitney test, one tailed |
|                     | DN; WT CD45.1:WT RANKL vs WT CD45.1: LT $\alpha$ <sup>-/-</sup> RANKL                           | 0.0463 | *  | Mann Whitney test, one tailed |
|                     | DP; WT CD45.1:WT GST vs WT CD45.1:WT RANKL                                                      | 0.0500 | *  | Mann Whitney test, one tailed |

Lopes *et al.* "Administration of RANK ligand boosts thymic regeneration upon bone marrow transplantation"

|                     |                                                                   |        |    |                               |
|---------------------|-------------------------------------------------------------------|--------|----|-------------------------------|
|                     | DP; WT CD45.1:WT RANKL vs WT CD45.1: LT $\alpha$ -/- RANKL        | 0.0500 | *  | Mann Whitney test, one tailed |
|                     | CD4+ SP; WT CD45.1:WT GST vs WT CD45.1:WT RANKL                   | 0.0500 | *  | Mann Whitney test, one tailed |
|                     | CD4+ SP; WT CD45.1:WT RANKL vs WT CD45.1: LT $\alpha$ -/- RANKL   | 0.0500 | *  | Mann Whitney test, one tailed |
|                     | CD8+ SP; WT CD45.1:WT RANKL vs WT CD45.1: LT $\alpha$ -/- RANKL   | 0.0500 | *  | Mann Whitney test, one tailed |
| Appendix Figure S5  | Frequency; WT CD45.1:WT GST vs WT CD45.1:WT RANKL                 | 0.0500 | *  | Mann Whitney test, two tailed |
|                     | Frequency; WT CD45.1:WT RANKL vs WT CD45.1: LT $\alpha$ -/- RANKL | 0.0500 | *  | Mann Whitney test, two tailed |
|                     | Numbers; WT CD45.1:WT GST vs WT CD45.1:WT RANKL                   | 0.0500 | *  | Mann Whitney test, two tailed |
|                     | Numbers; WT CD45.1:WT RANKL vs WT CD45.1: LT $\alpha$ -/- RANKL   | 0.0500 | *  | Mann Whitney test, two tailed |
| Appendix Figure S6A | CD45.1 total donor cells ; PBS vs RANKL                           | 0.0011 | ** | Mann Whitney test, one tailed |
|                     | CD45.1 total donor cells ; PBS vs IL-22                           | 0.0011 | ** | Mann Whitney test, one tailed |
|                     | CD45.1 total donor cells ; IL-22 vs IL-22 + RANKL                 | 0.0043 | ** | Mann Whitney test, two tailed |
|                     | CD45.1 total donor cells ; RANKL vs IL-22 + RANKL                 | 0.0043 | ** | Mann Whitney test, two tailed |
|                     | DN ; PBS vs IL-22                                                 | 0.0500 | *  | Mann Whitney test, one tailed |
|                     | DN ; PBS vs RANKL                                                 | 0.0500 | *  | Mann Whitney test, one tailed |
|                     | DP ; PBS vs IL-22                                                 | 0.0011 | ** | Mann Whitney test, one tailed |
|                     | DP ; PBS vs RANKL                                                 | 0.0011 | ** | Mann Whitney test, one tailed |
|                     | DP ; IL-22 vs IL-22 + RANKL                                       | 0.0043 | ** | Mann Whitney test, two tailed |
|                     | DP ; RANKL vs IL-22 + RANKL                                       | 0.0043 | ** | Mann Whitney test, two tailed |
|                     | CD4+SP ; PBS vs IL-22                                             | 0.0011 | ** | Mann Whitney test, one tailed |
|                     | CD4+SP ; PBS vs RANKL                                             | 0.0011 | ** | Mann Whitney test, one tailed |
|                     | CD4+SP ; IL-22 vs IL-22 + RANKL                                   | 0.0043 | ** | Mann Whitney test, two tailed |
|                     | CD4+SP ; RANKL vs IL-22 + RANKL                                   | 0.0043 | ** | Mann Whitney test, two tailed |
|                     | CD8+ SP ; PBS vs IL-22                                            | 0.0011 | ** | Mann Whitney test, one tailed |
|                     | CD8+ SP ; PBS vs RANKL                                            | 0.0011 | ** | Mann Whitney test, one tailed |
|                     | CD8+ SP ; IL-22 vs IL-22 + RANKL                                  | 0.0011 | ** | Mann Whitney test, two tailed |
|                     | CD8+ SP ; RANKL vs IL-22 + RANKL                                  | 0.0043 | ** | Mann Whitney test, two tailed |
| Appendix Figure S6B | ETPs ; PBS vs IL-22                                               | 0.0011 | ** | Mann Whitney test, one tailed |
|                     | ETPs ; PBS vs RANKL                                               | 0.0011 | ** | Mann Whitney test, one tailed |
|                     | ETPs ; IL-22 vs IL-22 + RANKL                                     | 0.0500 | *  | Mann Whitney test, two tailed |
|                     | ETPs ; RANKL vs IL-22 + RANKL                                     | 0.0500 | *  | Mann Whitney test, two tailed |
| Appendix Figure S6C | CD45.1 total donor cells ; PBS vs IL-22                           | 0.0011 | ** | Mann Whitney test, one tailed |
|                     | CD45.1 total donor cells ; PBS vs RANKL                           | 0.0011 | ** | Mann Whitney test, one tailed |
|                     | CD45.1 total donor cells ; IL-22 vs RANKL                         | 0.0022 | ** | Mann Whitney test, two tailed |
|                     | CD45.1 total donor cells ; RANKL vs IL-22 + RANKL                 | 0.0022 | ** | Mann Whitney test, two tailed |
|                     | CD45.1 total donor cells ; PBS vs IL-22 + RANKL                   | 0.0022 | ** | Mann Whitney test, two tailed |
|                     | CD4+ T cells ; PBS vs IL-22                                       | 0.0325 | *  | Mann Whitney test, one tailed |
|                     | CD4+ T cells ; PBS vs RANKL                                       | 0.0160 | *  | Mann Whitney test, one tailed |
|                     | CD4+ T cells ; PBS vs IL-22 + RANKL                               | 0.0303 | *  | Mann Whitney test, one tailed |
|                     | CD8+ T cells ; PBS vs IL-22                                       | 0.0500 | *  | Mann Whitney test, one tailed |

Lopes *et al.* "Administration of RANK ligand boosts thymic regeneration upon bone marrow transplantation"

|                     |                                                      |         |      |                               |
|---------------------|------------------------------------------------------|---------|------|-------------------------------|
|                     | CD8+ T cells ; PBS vs RANKL                          | 0.0500  | *    | Mann Whitney test, one tailed |
|                     | Foxp3+ Tregs ; PBS vs IL-22                          | 0.0130  | *    | Mann Whitney test, one tailed |
|                     | Foxp3+ Tregs ; PBS vs RANKL                          | 0.0011  | **   | Mann Whitney test, one tailed |
|                     | Foxp3+ Tregs ; PBS vs IL-22 + RANKL                  | 0.0152  | *    | Mann Whitney test, two tailed |
| Appendix Figure S6D | Total TECs; PBS vs RANKL                             | 0.0022  | **   | Mann Whitney test, two tailed |
|                     | Total TECs; GST vs RANKL                             | 0.0500  | *    | Mann Whitney test, two tailed |
|                     | Total TECs; RANKL vs IL-22 + RANKL                   | 0.0022  | **   | Mann Whitney test, two tailed |
|                     | cTECs; PBS vs RANKL                                  | 0.0022  | **   | Mann Whitney test, one tailed |
|                     | cTECs; IL-22 vs RANKL                                | 0.0411  | *    | Mann Whitney test, two tailed |
|                     | mTECs; PBS vs RANKL                                  | 0.0022  | **   | Mann Whitney test, one tailed |
|                     | mTECs; IL-22 vs RANKL                                | 0.0500  | *    | Mann Whitney test, two tailed |
|                     | mTECs; RANKL vs IL-22 + RANKL                        | 0.0022  | **   | Mann Whitney test, two tailed |
| Appendix Figure S6E | CD80loAire- ; PBS vs RANKL                           | 0.0411  | *    | Mann Whitney test, one tailed |
|                     | CD80loAire- ; IL-22 vs RANKL                         | 0.0500  | *    | Mann Whitney test, two tailed |
|                     | CD80loAire- ; RANKL vs IL-22 + RANKL                 | 0.0087  | **   | Mann Whitney test, two tailed |
|                     | CD80hiAire- ; PBS vs IL-22                           | 0.0130  | *    | Mann Whitney test, one tailed |
|                     | CD80hiAire- ; PBS vs RANKL                           | 0.0011  | **   | Mann Whitney test, one tailed |
|                     | CD80hiAire- ; RANKL vs IL-22 + RANKL                 | 0.0043  | **   | Mann Whitney test, two tailed |
|                     | CD80hiAire+ ; PBS vs IL-22                           | 0.0130  | *    | Mann Whitney test, one tailed |
|                     | CD80hiAire+ ; PBS vs RANKL                           | 0.0011  | **   | Mann Whitney test, one tailed |
|                     | CD80hiAire+ ; RANKL vs IL-22 + RANKL                 | 0.0043  | **   | Mann Whitney test, two tailed |
| Appendix Figure S6F | cTEChi ; PBS vs RANKL                                | 0.0022  | **   | Mann Whitney test, one tailed |
|                     | cTEChi ; IL-22 vs RANKL                              | 0.0022  | **   | Mann Whitney test, two tailed |
|                     | cTEChi ; RANKL vs IL-22 + RANKL                      | 0.0043  | **   | Mann Whitney test, two tailed |
|                     | mTEChi ; PBS vs IL-22                                | 0.0011  | **   | Mann Whitney test, one tailed |
|                     | mTEChi ; PBS vs RANKL                                | 0.0011  | **   | Mann Whitney test, one tailed |
|                     | mTEChi ; RANKL vs IL-22 + RANKL                      | 0.0022  | **   | Mann Whitney test, two tailed |
|                     | mTEChi ; IL-22 vs IL-22 + RANKL                      | 0.0087  | **   | Mann Whitney test, two tailed |
|                     | TEClo ; PBS vs RANKL                                 | 0.0022  | **   | Mann Whitney test, one tailed |
|                     | TEClo ; IL-22 vs RANKL                               | 0.0043  | **   | Mann Whitney test, two tailed |
|                     | TEClo ; IL-22 vs IL-22 + RANKL                       | 0.0022  | **   | Mann Whitney test, two tailed |
|                     | mTEClo ; PBS vs RANKL                                | 0.0043  | **   | Mann Whitney test, one tailed |
|                     | mTEClo ; IL-22 vs RANKL                              | 0.0043  | **   | Mann Whitney test, two tailed |
|                     | mTEClo ; IL-22 vs IL-22 + RANKL                      | 0.0022  | **   | Mann Whitney test, two tailed |
| Appendix Figure S6G | PBS vs RANKL                                         | 0.0043  | **   | Mann Whitney test, one tailed |
|                     | IL-22 vs RANKL                                       | 0.0087  | **   | Mann Whitney test, two tailed |
|                     | RANKL vs IL-22 + RANKL                               | 0.0022  | **   | Mann Whitney test, two tailed |
| Appendix Figure S7A | CD4+ T cells; WT CD45.1:WT GST vs WT CD45.1:WT RANKL | 0.0476  | *    | Mann Whitney test, one tailed |
|                     | CD8+ T cells; WT CD45.1:WT GST vs WT CD45.1:WT RANKL | 0.0476  | *    | Mann Whitney test, one tailed |
| Appendix Figure S7B | Foxp3+ Tregs; WT CD45.1:WT GST vs WT CD45.1:WT RANKL | 0.0476  | *    | Mann Whitney test, one tailed |
| Appendix Figure S9A | Area; GST vs RANKL-GST                               | <0.0001 | **** | T-test                        |

Lopes *et al.* "Administration of RANK ligand boosts thymic regeneration upon bone marrow transplantation"

|                        |                             |        |    |                               |
|------------------------|-----------------------------|--------|----|-------------------------------|
| Appendix<br>Figure S9B | Frequency; GST vs RANKL-GST | 0.0043 | ** | Mann Whitney test, two tailed |
|                        | Numbers; GST vs RANKL-GST   | 0.0043 | ** | Mann Whitney test, two tailed |
