# Supplementary material for: Administration of RANKL boosts thymic regeneration upon bone marrow transplantation
Source: PubMed Central journal article supplement (PMC5452038; doi:10.15252/emmm.201607176), 2017-04-28
Supplement: EMMM-9-835-s002.pdf [file EMMM-9-835-s002.pdf]

## Expanded View Figures

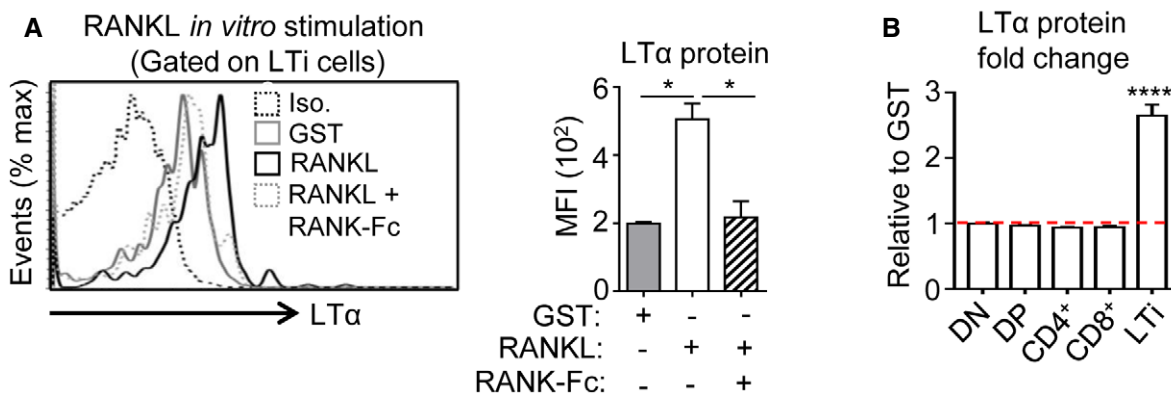

**Figure EV1.** *In vitro* stimulation with RANKL induces the upregulation of LTα specifically in thymic LTi cells.

A LTα protein expression was analyzed by flow cytometry in thymic LTi cells from sublethally irradiated WT mice treated *in vitro* for 24 h with GST, RANKL-GST, or RANKL-GST + RANK-Fc. The histogram shows the MFI of LTα for each condition. Iso: Isotype control.

B LTα protein was analyzed in DN, DP, CD4<sup>+</sup>, and CD8<sup>+</sup> SP as well as in LTi cells purified from sublethally irradiated WT mice and treated *in vitro* for 24 h with GST or RANKL-GST. Results are represented as fold change relative to the GST condition.

Data information: Data are shown as mean ± SEM and are pooled of two independent experiments with similar results ( $n = 3$  mice per group). \* $P < 0.05$ ; \*\*\*\* $P < 0.0001$ . Exact  $P$ -values and statistical tests used to calculate them are provided in Appendix Table S2.

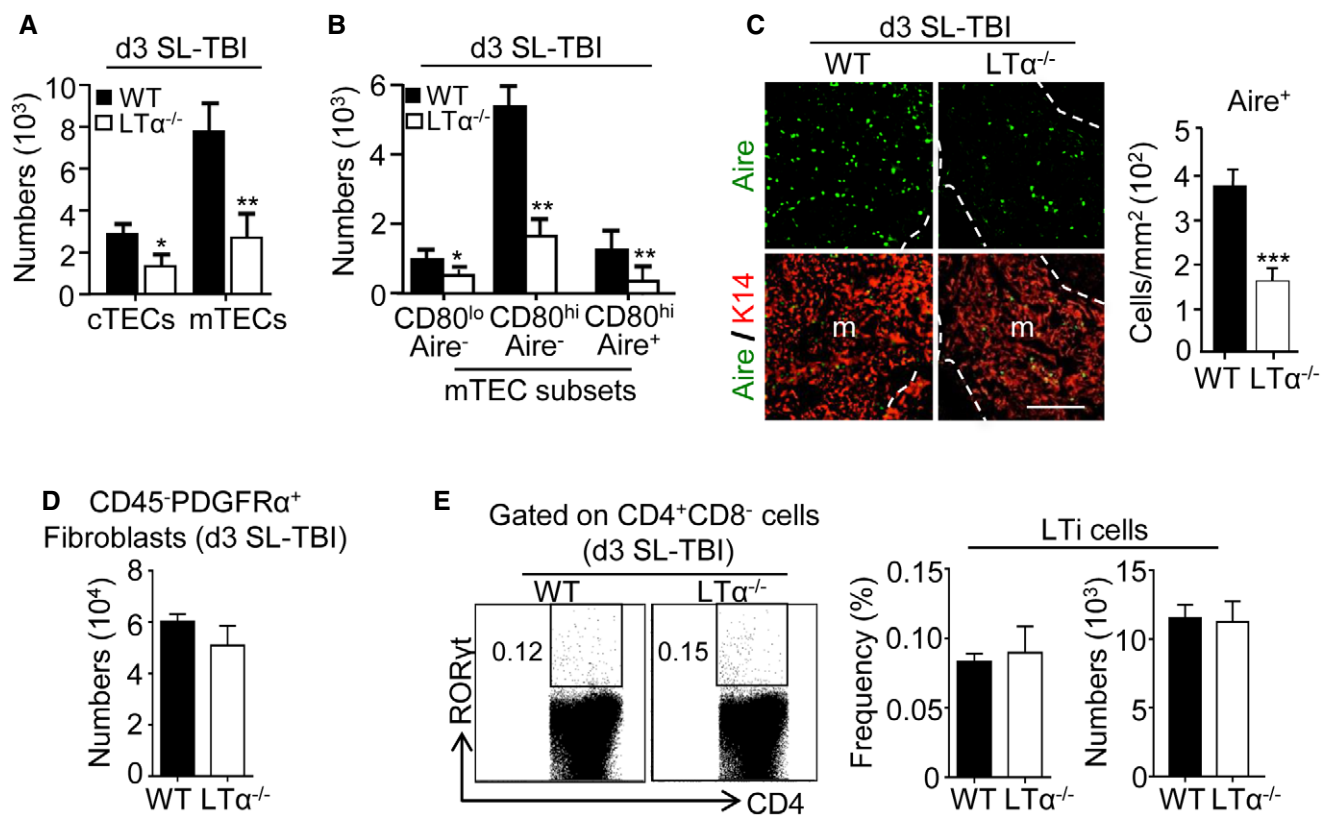

**Figure EV2. TECs but not fibroblasts and LTI cells are severely reduced in  $LT\alpha^{-/-}$  mice at d3 SL-TBI.**

A, B Histograms show numbers of cTECs and mTECs (A) as well as mTEC subsets (B) in WT and  $LT\alpha^{-/-}$  mice at d3 SL-TBI.

C Thymic sections from WT and  $LT\alpha^{-/-}$  mice at d3 SL-TBI were stained for the expression of K14 and Aire. The histogram shows the density of Aire<sup>+</sup> cells in medullary area. m, medulla. Fifteen sections were quantified; scale bar: 100  $\mu$ m.

D The histogram shows numbers of CD45<sup>+</sup>PDFR $\alpha^+$  fibroblasts in WT and  $LT\alpha^{-/-}$  mice at d3 SL-TBI.

E Flow cytometry profiles and frequencies of thymic LTI cells from WT or  $LT\alpha^{-/-}$  mice at d3 SL-TBI.

Data information: Data are shown as mean  $\pm$  SEM and are pooled of five independent experiments with similar results ( $n = 3$  mice per group). \* $P < 0.05$ ; \*\* $P < 0.01$ ; \*\*\* $P < 0.001$ . Exact  $P$ -values and statistical tests used to calculate them are provided in Appendix Table S2.

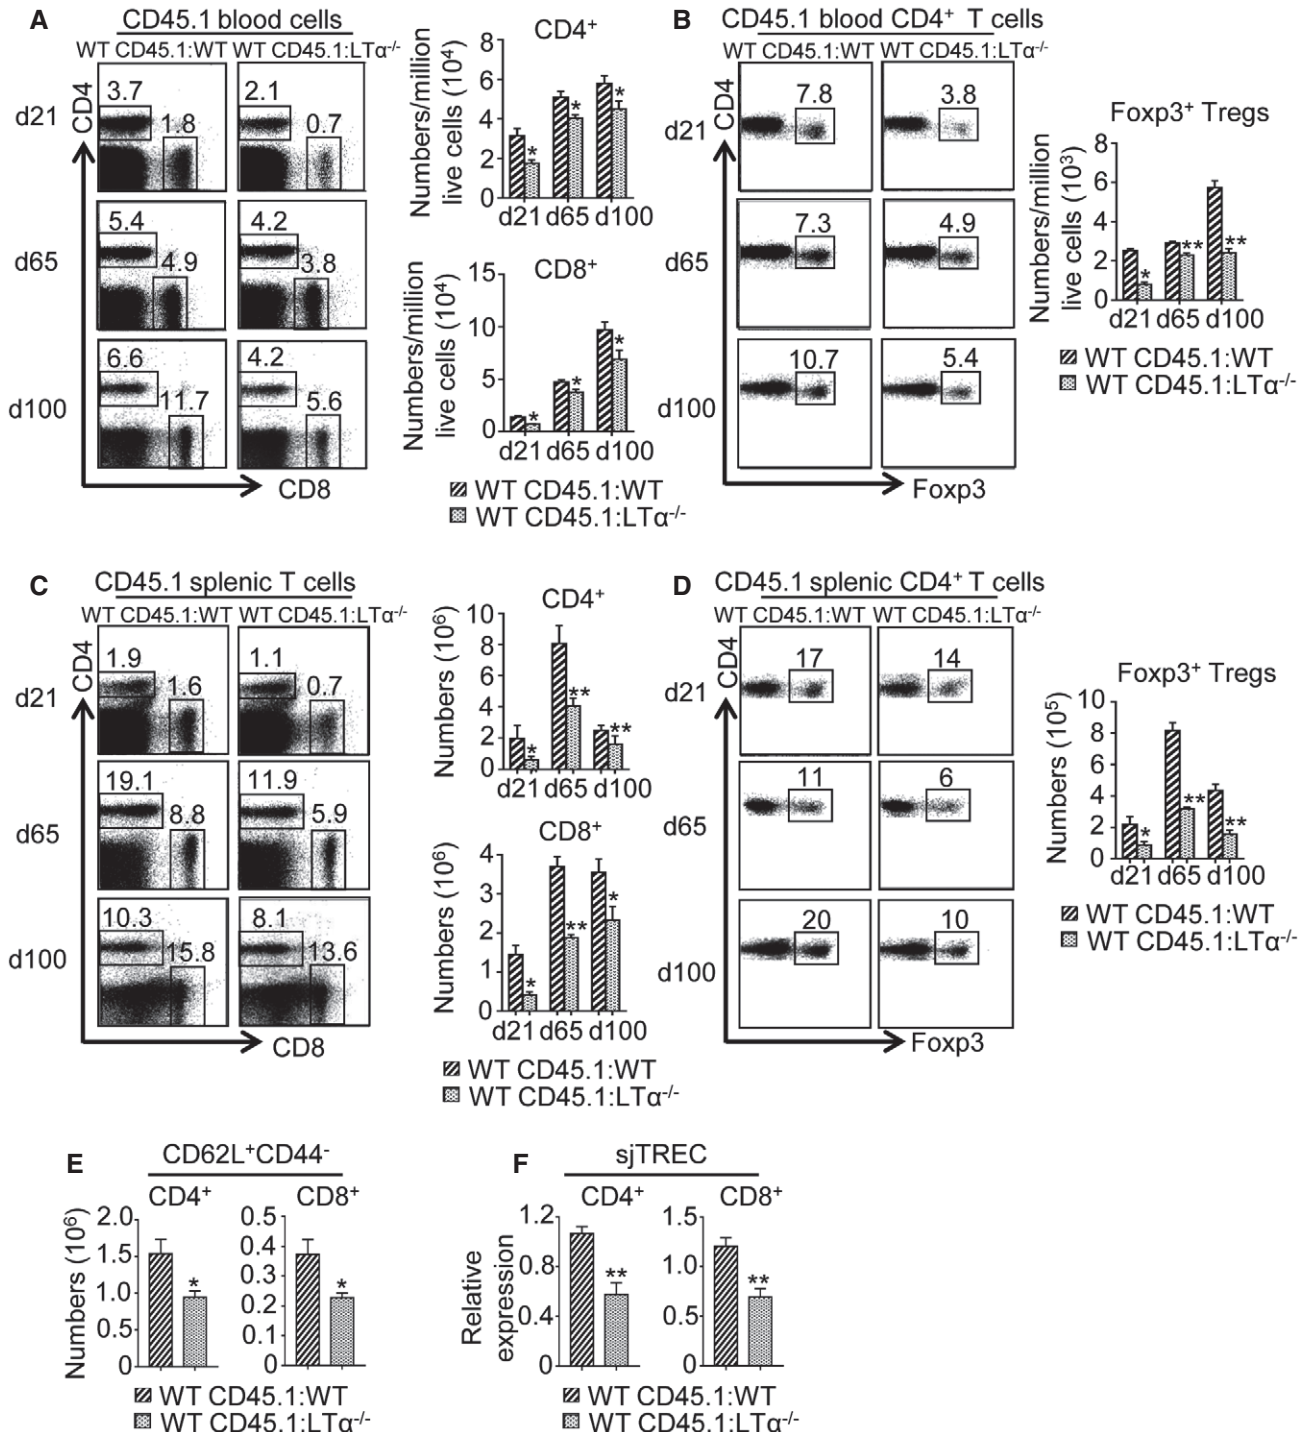

**Figure EV3. LT $\alpha$  expression during BMT is required for peripheral T-cell reconstitution.**

A–D Flow cytometry profiles and numbers of CD4<sup>+</sup> and CD8<sup>+</sup> T cells (A, C) as well as CD4<sup>+</sup>Foxp3<sup>+</sup> Tregs (B, D) from CD45.1 donor origin in blood (A, B) and spleen (C, D) of WT CD45.1:WT and WT CD45.1:LT $\alpha^{-/-}$  mice at d21, d65, and d100 upon BMT. Significance relative to WT CD45.1:WT chimeras.

E Histograms show numbers of CD62L<sup>+</sup>CD44<sup>-</sup> naïve CD4<sup>+</sup> and CD8<sup>+</sup> T cells in the spleen of WT CD45.1:WT and WT CD45.1:LT $\alpha^{-/-}$  mice at d21 pBMT.

F sjTREC were quantified by qPCR from genomic DNA of cell-sorted splenic CD4<sup>+</sup> and CD8<sup>+</sup> T cells from WT CD45.1:WT and WT CD45.1:LT $\alpha^{-/-}$  mice at d21 pBMT.

Data information: Data are shown as mean  $\pm$  SEM and are pooled of two independent experiments with similar results ( $n = 3\text{--}5$  mice per group). \* $P < 0.05$ ; \*\* $P < 0.01$ ; one-tailed Mann–Whitney  $U$ -test. Exact  $P$ -values are provided in Appendix Table S2.

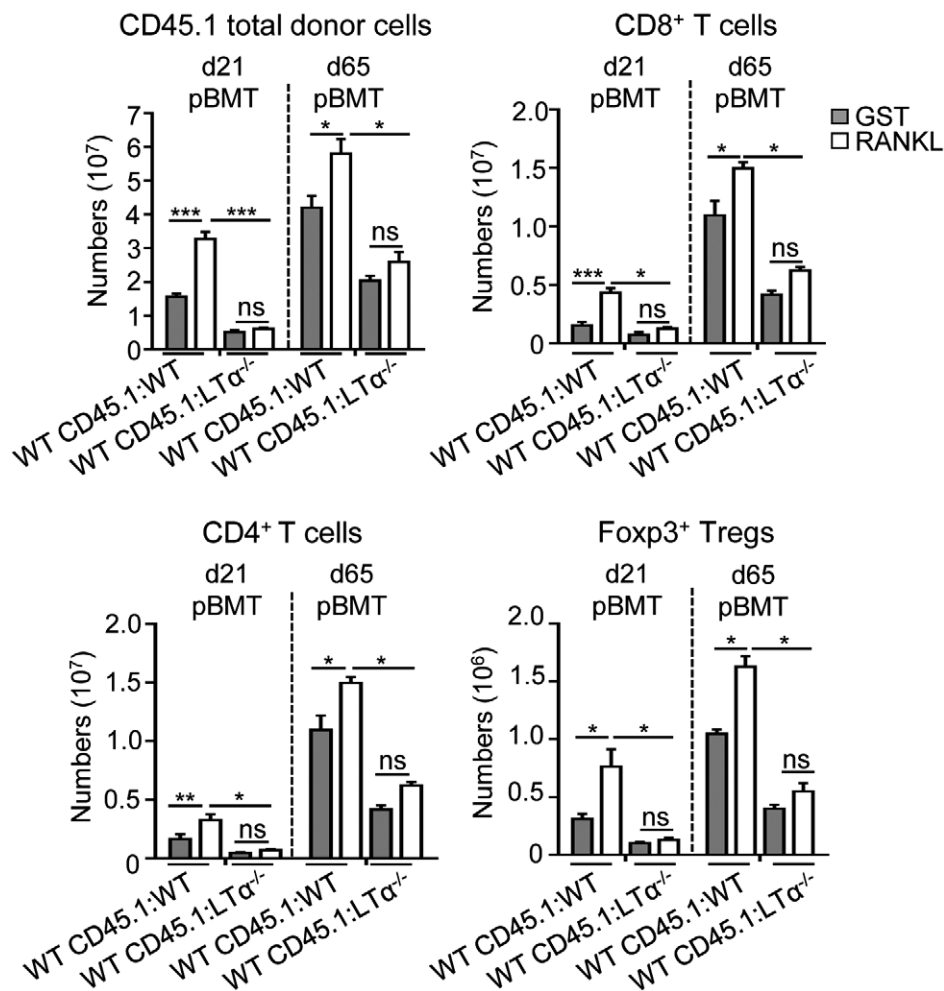

**Figure EV4. RANKL treatment early after BMT boosts peripheral T-cell reconstitution optimally in an LTα-dependent manner.**

Histograms show numbers of total cells and CD4<sup>+</sup> and CD8<sup>+</sup> T cells as well as CD4<sup>+</sup>Foxp3<sup>+</sup> Tregs from CD45.1 donor origin in the spleen of WT CD45.1:WT and WT CD45.1:LTα<sup>-/-</sup> mice treated with GST or RANKL proteins at d2, d4, and d6 pBMT and analyzed at d21 and d65 pBMT. pBMT: post-bone marrow transplantation. Data are shown as mean ± SEM and are pooled of three independent experiments with similar results (n = 3–5 mice per group). \*P < 0.05; \*\*P < 0.01; \*\*\*P < 0.001; one-tailed Mann–Whitney U-test. Exact P-values are provided in Appendix Table S2.

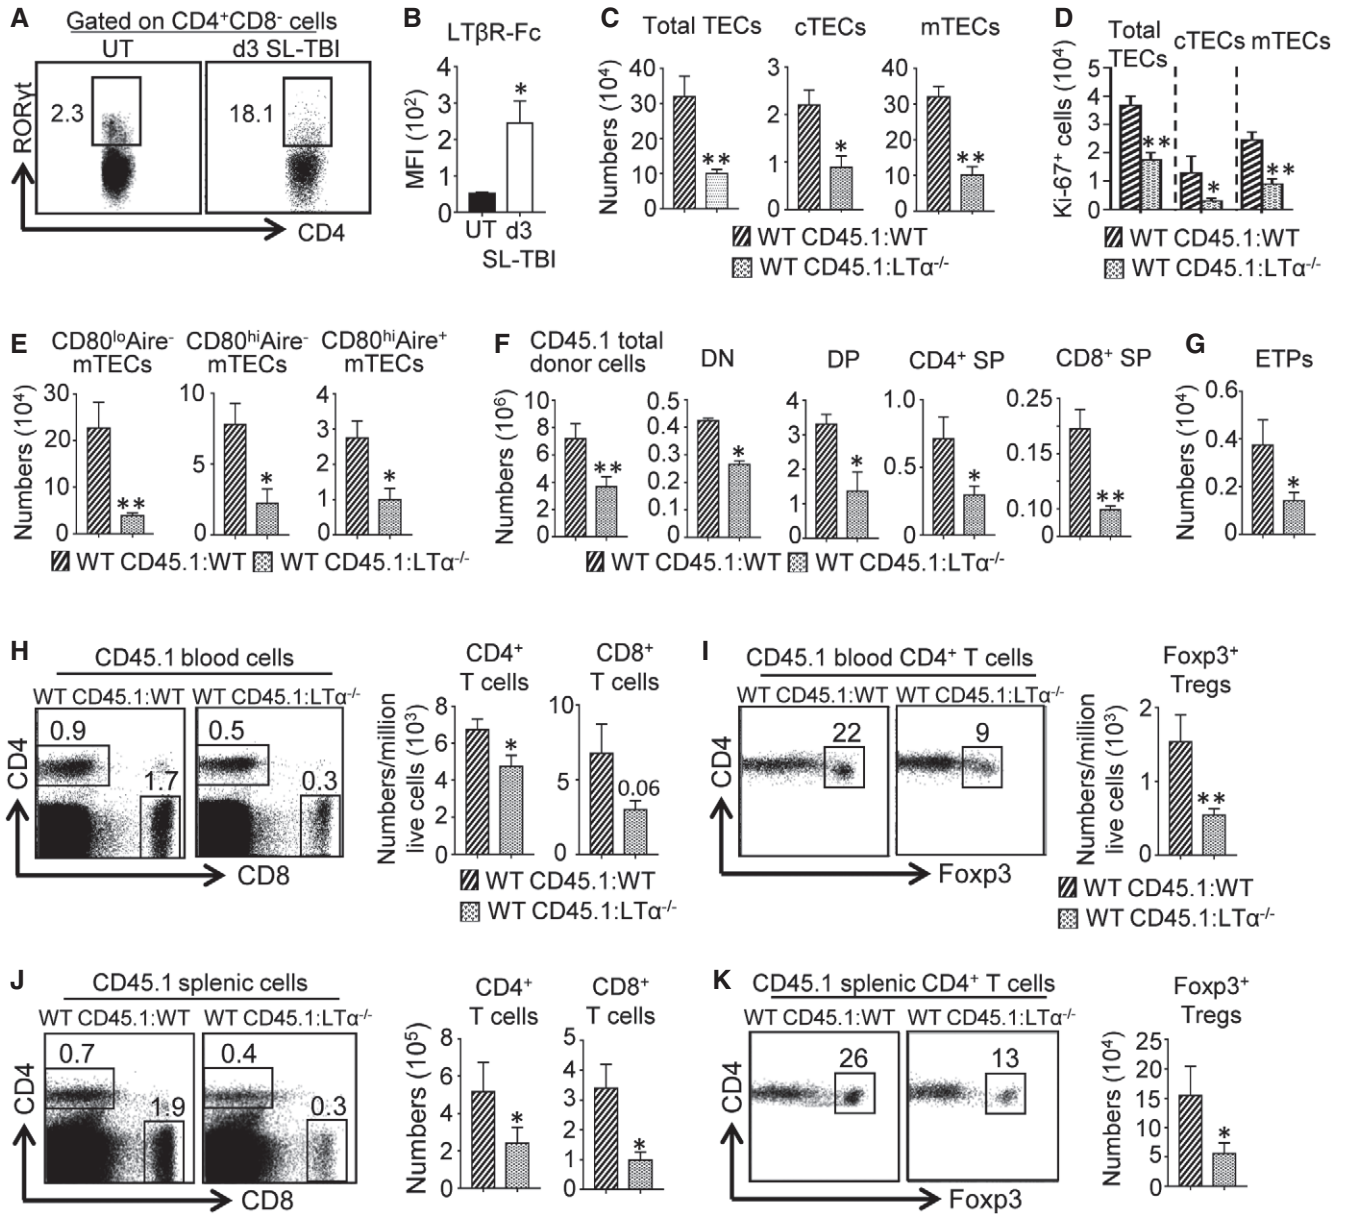

**Figure EV5. The critical role of LTα in thymic regeneration and peripheral T-cell reconstitution persists with age.**

A CD4<sup>+</sup>CD8<sup>-</sup> thymic cells from 8-month-old UT WT mice ( $n = 9$ ) or at d3 SL-TBI ( $n = 6$ ) were analyzed for the expression of RORγt by flow cytometry.  
 B MFI of LTβR-Fc staining in thymic LT1 cells from 6- to 8-month-old UT WT mice or at d3 SL-TBI.  
 C-G Histograms show numbers of total TECs, cTECs, mTECs (C); Ki-67<sup>+</sup> TEC subsets (D); mTEC subsets (E); total thymic cells, T-cell subsets (DN, DP, CD4<sup>+</sup> SP, and CD8<sup>+</sup> SP) (F); and ETPs (G) in the thymus of WT CD45.1:WT and WT CD45.1:LTα<sup>-/-</sup> chimeras of 6–8 months of age at d21 upon BMT.  
 H–K Flow cytometry profiles and numbers of CD4<sup>+</sup> and CD8<sup>+</sup> T cells (H, J) as well as CD4<sup>+</sup>Foxp3<sup>+</sup> Tregs (I, K) from CD45.1 donor origin in blood (H, I) and spleen (J, K) of WT CD45.1:WT and WT CD45.1:LTα<sup>-/-</sup> mice of 6–8 months of age at d21 pBMT. Significance relative to WT CD45.1:WT chimeras.

Data information: Data are shown as mean ± SEM and are pooled of two independent experiments with similar results ( $n = 3$  mice per group). \* $P < 0.05$ ; \*\* $P < 0.01$ ; one-tailed Mann–Whitney  $U$ -test. Exact  $P$ -values are provided in Appendix Table S2.
